# Supplementary material for: Dementia in Latin America: Paving the way toward a regional action plan
Source: PubMed Central journal article supplement — Alzheimers Dement. 2020 Nov 20;17(2):295–313. doi: 10.1002/alz.12202 (PMC7984223; doi:10.1002/alz.12202), 2020-11-20
Supplement: ALZ-17-295-s002.pdf [file ALZ-17-295-s002.pdf]

## Annex 1. LAC epidemiologic studies

| LAC assessed                                          | Study name                                                                                                                       | Study type                                                                                              | N° of participants                              | Main results                                                                                                                                                                                                                                                                          | Crude prevalence for LAC (%) | Representative publication                                                                 | Other information                     |
|-------------------------------------------------------|----------------------------------------------------------------------------------------------------------------------------------|---------------------------------------------------------------------------------------------------------|-------------------------------------------------|---------------------------------------------------------------------------------------------------------------------------------------------------------------------------------------------------------------------------------------------------------------------------------------|------------------------------|--------------------------------------------------------------------------------------------|---------------------------------------|
| Cuba, Dominican Republic, Venezuela, Mexico, and Peru | The 10/66 Dementia Research Group                                                                                                | Epidemiologic comparison of developmental countries                                                     | 14960                                           | Compared with the 10/66 dementia algorithm, the DSM-IV dementia criterion might underestimate dementia prevalence, in regions with low awareness of this problematic.                                                                                                                 | 5.0-7.7                      | Llibre R., et al. Lancet 2008; 372(9637): 464-74.                                          | --                                    |
| Chile                                                 | GERO cohort: Functional decline in Cognitive Complaint Cohort in community living elderly, Chile, 2017-2022                      | Follow-up study of community living elderly with cognitive complaint, through a population based study. | 300 (to date 160 participants included)         | Ongoing                                                                                                                                                                                                                                                                               | --                           | None to date (protocol cohort in preparation)                                              | Funding FONDAP Program Grant 15150012 |
| Chile                                                 | Cost of dementia in Chile                                                                                                        | Cross-sectional study.                                                                                  | 330 patients with dementia and their caregivers | Average monthly cost per patient is estimated at US\$ 1463. Direct medical costs account for 20%, direct social costs for 5% and indirect costs for 75% of the total cost. The mean monthly cost is found to be inversely related to SES, a pattern largely driven by indirect costs. | --                           | Hojman DA., et al. Plos One 2017; 12(3): e0172204.                                         | --                                    |
| Chile                                                 | Burden of informal caregivers of people with Alzheimer's Disease and other dementias                                             | Cross sectional survey                                                                                  | 292 caregivers of dementia patients             | 80% were female; 63% presented severe burden, and 47% exhibited psychiatric morbidity.                                                                                                                                                                                                | --                           | --                                                                                         | --                                    |
| Chile                                                 | Mortality of dementia and its geographical distribution                                                                          | Observational Study of mortality registries                                                             | 3852 dementia patients                          | 3852 dementia deaths in 2012 (including 1585 Alzheimer's disease deaths). Dementia SMRs were increased in the Norte Grande (men: 126, 95% CI 100-159; women: 130, 95% CI 112-169) and the Zona Central,                                                                               | --                           | Russ TC., et al. Dement Geriatr Cogn Disord. 2016; 42(1-2):31-41.                          | --                                    |
| Chile                                                 | Health conditions and unmet needs for assistance to perform activities of daily living among older adults with dementia in Chile | Observational Study                                                                                     | 4655 participants above 60 years old            | People with dementia had worse health and needed greater assistance in performing daily activities than people without dementia. Being male was associated with more unmet needs,.                                                                                                    | 9.6                          | Zhou I., et al. Chile International Journal of Geriatric Psychiatry 2018; 33 (7): 964-971. | --                                    |

|                    |                                                                                         |                                                                                                                   |      |                                                                                                                                                                                                                                                                   |      |                                                                           |                                                                        |
|--------------------|-----------------------------------------------------------------------------------------|-------------------------------------------------------------------------------------------------------------------|------|-------------------------------------------------------------------------------------------------------------------------------------------------------------------------------------------------------------------------------------------------------------------|------|---------------------------------------------------------------------------|------------------------------------------------------------------------|
| Brazil (Sao Paulo) | Sao Paulo Ageing & Health Study (SPAH)                                                  | Cross-sectional study                                                                                             | 2072 | Prevalence increased with age for both men and women after age 75, but was stable from 65 to 74 years. Low education and income were associated with increased risk of dementia.                                                                                  | 5.1  | Scazufca et al., International Psychogeriatrics 2008; 20:2,394–405        | --                                                                     |
| Brazil (Sao Paulo) | Sao Paulo Ageing & Health Study (SPAH)                                                  | Cross-sectional study                                                                                             | 2005 | Socioeconomic disadvantage in early life was associated with increased prevalence of dementia                                                                                                                                                                     | 5.1  | Scazufca et al., International Journal of Epidemiology 2008;37:879–890    | --                                                                     |
| Brazil (Sao Paulo) | Sao Paulo Ageing & Health Study (SPAH)                                                  | Cross-sectional study                                                                                             | 2003 | Dementia was more prevalent amongst participants who were illiterate, had non-skilled occupations and lower income. Illiteracy, poor occupational achievement and low income accounted for 22.0%, 38.5% and 38.5% of the cases of dementia, respectively          | --   | Scazufca et al., International Psychogeriatrics 2010; 22:8,1209–1215      | --                                                                     |
| Brazil (Sao Paulo) | Sao Paulo Ageing & Health Study (SPAH)                                                  | Cross-sectional study                                                                                             | 1373 | After age adjustment, we found an association of subclinical hyperthyroidism and any type of dementia and vascular dementia. Analyzing data by gender, we found an association of subclinical hyperthyroidism with dementia and Alzheimer's disease only for men. | 4.40 | Benseñor et al. BMC Public Health 2010; 10:298                            | Grant research: FAPESP, SP, Brazil, Welcome Trust, London, UK and CNPq |
| Perú (Lima)        | Dementia prevalence in a Lima, Peru urban community: door-to-door study                 | Cross-sectional study                                                                                             | 1532 | Alzheimer's disease was the most frequent diagnosis (56,2%). Dementia prevalence increased with age mainly in females. Age, female sex and low education correlated with dementia prevalence.                                                                     | 6.85 | Custodio et al. An Fac Med 2008; 69 (4): 233-238                          |                                                                        |
| Perú (Lima)        | Cost-of-illness study in a retrospective cohort of patients with dementia in Lima, Peru | A retrospective, cohort, 3-month study was carried out during the period spanning from January 2012 to April 2013 | 136  | Demented patients had costs of US\$ 1500 or over (and more than US\$ 1860 for frontotemporal dementia). The monthly cost of a demented patient (US\$ 570) was 2.5 times higher than the minimum wage (legal minimum monthly wage in Peru for 2011: US\$ 222.22).  | --   | Custodio et al. Dement Neuropsychol 2015; 9 (1): 32-41                    | --                                                                     |
| Brazil (Sao Paulo) | Brain Bank from the Biobank for Aging Studies                                           | Cross-sectional study                                                                                             | 1200 | Vascular dementia was common. Even few years of education were associated with lower dementia risk                                                                                                                                                                | --   | 1- Suemoto CK., et al. PLoS Med. 2017; 14:e1002267. 2- Farfel JM., et al. | --                                                                     |

|                                                                                         |                                                                                      |                          |       |                                                                                                                                                                              |       |                                                                                                                                                                                                                                                                                                                                                                                                                                |    |
|-----------------------------------------------------------------------------------------|--------------------------------------------------------------------------------------|--------------------------|-------|------------------------------------------------------------------------------------------------------------------------------------------------------------------------------|-------|--------------------------------------------------------------------------------------------------------------------------------------------------------------------------------------------------------------------------------------------------------------------------------------------------------------------------------------------------------------------------------------------------------------------------------|----|
|                                                                                         |                                                                                      |                          |       |                                                                                                                                                                              |       | Neurology 2013;<br>81:650-7.                                                                                                                                                                                                                                                                                                                                                                                                   |    |
| Brazil<br>(Tremembé)                                                                    | Prevalence of Cognitive Impairment Without Dementia and Dementia in Tremembé, Brazil | Cross-sectional study    | 630   | The prevalence of dementia in this study was higher than in other studies, particularly among younger elderly.                                                               | 17.50 | César KG., et al. Alzheimer Dis Assoc Disord. 2016 Jul-Sep; 30(3):264-71.                                                                                                                                                                                                                                                                                                                                                      | -- |
| Brazil<br>(Catanduva)                                                                   | Epidemiologic Survey of Dementia in a Community-Dwelling Brazilian Population.       | Cross-sectional study    | 1656  | AD was the most frequent diagnosis. Age, female gender, and low educational level were significantly associated with a higher prevalence of dementia.                        | 7.10  | Herrera E. Jr., et al. Alzheimer Dis Assoc Disord. 2002 Apr-Jun; 16(2):103-8.                                                                                                                                                                                                                                                                                                                                                  | -- |
| Brazil (São Paulo, Belo Horizonte, Porto Alegre, Salvador, Rio de Janeiro, and Vitória) | Brazilian Longitudinal of Adult Health (ELSA-Brasil)                                 | Prospective cohort study | 15105 | The ELSA-Brasil investigated several risk factors related to cognitive performance, as subclinical atherosclerosis, inflammation, thyroid function, and postural hypotension | --    | 1- Suemoto CK., et al. Atherosclerosis 2015; 243:510-5.<br>2- Suemoto CK., et al. Int J Geriatr Psychiatry. 2017.<br>3- Suemoto CK., et al. J Gerontol A Biol Sci Med Sci. 2018. 4- Szejf C. et al. Psychoneuroendocrinology 2018; 87: 152-158. 5- Baena CP., et al. Exp Gerontol 2017; 92:82-86.<br>6- Cezaretto A., et al. Diabetol Metab Syndr. 2018; 10:54. 7- Pellegrino Baena C., et al. Cephalalgia 2018; 38:1525-1534. | -- |

|                                                  |                                                                                             |                                                                      |                                                                    |                                                                                                                                                                                                                                                                                                           |                 |                                                                                                                                                                                                                                                                                                                                           |    |
|--------------------------------------------------|---------------------------------------------------------------------------------------------|----------------------------------------------------------------------|--------------------------------------------------------------------|-----------------------------------------------------------------------------------------------------------------------------------------------------------------------------------------------------------------------------------------------------------------------------------------------------------|-----------------|-------------------------------------------------------------------------------------------------------------------------------------------------------------------------------------------------------------------------------------------------------------------------------------------------------------------------------------------|----|
| Brazil (Caeté)                                   | The Pietà Study                                                                             | Cross-sectional study                                                | 639                                                                | Age, low education and previous history of depression were associated with dementia diagnoses. High prevalence of severe white matter lesions on MRI was observed and white matter lesions were associated with hypertension and cognitive status. Parkinsonism was identified in 10.7% of the population | 27.50           | 1- Caramelli P., et al. Arq Neuropsiquiatr 2011; 69: 579-84.<br>2- Caramelli P., et al. Alzheimers Dementia 2009; 5 (Suppl.): 391-2.<br>3- Resende EPF., et al. eNeurologicalSci. 2016; 5:30-34.<br>4- Vale TC., et al. Parkinsonism Relat Disord 2018; 56:76-81.<br>5- Leles da Costa Dias F., et al. J Affect Disord 2019; 242:173-179. | -- |
| Brazil (Catanduva)                               | Incidence of dementia in a community-dwelling Brazilian population                          | Prospective cohort study                                             | 1119 individuals were rescreened (3.25 years after previous study) | The prevalence rates of dementia almost doubled with every 5 years of age.                                                                                                                                                                                                                                | 13.8 (per 1000) | Nitrini, R. et al. Alzheimer Dis. Assoc. Disord. 2004; 18, 241-246.                                                                                                                                                                                                                                                                       | -- |
| Uruguay, Perú, Chile, Brazil, Venezuela and Cuba | Prevalence of dementia in Latin America : a collaborative study of population-based cohorts | A collaborative study of population-based cohorts                    | 31174                                                              | The global prevalence of dementia in LA proved similar to developed countries, although a higher prevalence of dementia in relatively young subjects was evidenced.                                                                                                                                       | 7.10            | Nitrini R, et al. Int Psychogeriatr. 2009; 21(4): 622-30                                                                                                                                                                                                                                                                                  | -- |
| Brazil (Piraju)                                  | Identification of dementia cases in the community: a Brazilian experience                   | Community-based dementia case-finding method (cross-sectional study) | 2222 participants above 65 years old                               | Most of the dementia cases correspond to Alzheimer's disease and vascular dementia                                                                                                                                                                                                                        | 2               | Ramos-Cerqueira, A., et al. J. Am. Geriatr. Soc. 2005; 53, 1738-1742.                                                                                                                                                                                                                                                                     | -- |

|                                                                                                         |                                                                                                                                              |                                                                                                                                                                                       |                                                         |                                                                                                                                                                                                                                          |                                                                                                |                                                                                    |    |
|---------------------------------------------------------------------------------------------------------|----------------------------------------------------------------------------------------------------------------------------------------------|---------------------------------------------------------------------------------------------------------------------------------------------------------------------------------------|---------------------------------------------------------|------------------------------------------------------------------------------------------------------------------------------------------------------------------------------------------------------------------------------------------|------------------------------------------------------------------------------------------------|------------------------------------------------------------------------------------|----|
| Brazil (Sao Paulo)                                                                                      | Estimate of Dementia Prevalence in a Community Sample from São Paulo, Brazil                                                                 | Cross-sectional study (A cluster random sampling of a population of individuals aged 60 years and over from three different socioeconomic classes (up- per, middle and low) was used) | 1563 participants above 60 years old                    | Dementia prevalence was 12.9%, considering design effect, nonresponse during the community phase, and positive and negative predictive values. The most common cause of dementia was Alzheimer's disease, followed by vascular dementia. | 6.80                                                                                           | Bottino, C. M. et al. Dementia and Geriatric Cognitive Disorders 2008; 26, 291–299 | -- |
| Peru, Mexico, China, and India, and in three urban sites in Cuba, the Dominican Republic, and Venezuela | Prevalence , Distribution , and Impact of Mild Cognitive Impairment in Latin America , China , and India : A 10 / 66 Population- Based Study | Data from the cross-sectional phase of the 10/66 Dementia Research Group (DRG) program on dementia (focused on MCI epidemiological research)                                          | 15376 > 65+ without dementia (approx. 2000 per country) | After direct standardization for age, gender and education level, MCI prevalence was = 1.5 for Cuba; 1.3 for Dominican Rep.; 2.6 for Perú; 1.0 for Venezuela, 2.8 for Mexico and 3.0 for Puerto Rico.                                    | Cuba = 1.8; Dominican Rep. = 1.4; Peru = 3.1; Venezuela = 1.2; Mexico = 3.2; Puerto Rico = 3.9 | Sosa AL, et al. PLoS medicine 2012; 9(2): e1001170                                 | -- |
| Cuba (Havana City and Matanza provinces)                                                                | The 10/66 study in Cuba                                                                                                                      | Cross-sectional door-to-door study                                                                                                                                                    | 2944 participants above 60 years old                    | Dementia was the main cause of disability and dependency in the study population                                                                                                                                                         | 10.80                                                                                          | Llibre Jde J, et al. MEDICC Rev 2011; 13(4):30-7                                   | -- |
| Chile                                                                                                   | National Survey of Dependency (NSD) in the elderly (2010)                                                                                    | Cross-sectional survey, carried out in a probabilistic sample of independent-living older adults                                                                                      | 4860 participants above 60 years old                    | --                                                                                                                                                                                                                                       | 7.00                                                                                           | SENAMA 2010. Estudio Nacional de la Dependencia en las Personas Mayores.           | -- |
| Venezuela (Caribbean coast)                                                                             | Population-based Maracaibo Aging Study                                                                                                       | Cross-sectional                                                                                                                                                                       | 2438 participants above 65 years old                    | The most frequent type of dementia was Alzheimer's disease, followed by vascular dementia.                                                                                                                                               | 8.04                                                                                           | Molero, A. E., et al. Neuroepidemiology 2007; 29, 107–112                          |    |

|                                                                        |                                                                                                                          |                                                                                  |                                                                                                                       |                                                                                                                                                                                                                                                                            |                               |                                                                              |    |
|------------------------------------------------------------------------|--------------------------------------------------------------------------------------------------------------------------|----------------------------------------------------------------------------------|-----------------------------------------------------------------------------------------------------------------------|----------------------------------------------------------------------------------------------------------------------------------------------------------------------------------------------------------------------------------------------------------------------------|-------------------------------|------------------------------------------------------------------------------|----|
| Uruguay                                                                | Prevalence of demential syndromes in a population of Uruguay: Study of 'Villa del Cerro'                                 | Cross-sectional                                                                  | --                                                                                                                    | --                                                                                                                                                                                                                                                                         | 4.03                          | Ketzoian C, et al., J Neurol Sci 1997; 150(suppl):155.                       | -- |
| Cuba (Havana City municipality of Playa)                               | Prevalence of Dementia and Alzheimer's Disease in a Havana Municipality: A Community-Based Study among Elderly Residents | Cross-sectional                                                                  | 18351 participants above 65 years old                                                                                 | Alzheimer's disease was the most frequent cause of dementia, followed by mixed dementias. Risk factors associated with dementia were: history of stroke, hypertension, depression, skull-brain trauma, family history of dementia, low educational level and advanced age. | 8.20                          | Llibre J., et al. MEDICC Rev 2009; 11(2):29-35.                              | -- |
| Colombia (central, southwest, northwest, eastern, and Caribbean coast) | National Neuroepidemiological Study (EPINEURO)                                                                           | Cross-sectional survey                                                           | 8910                                                                                                                  | --                                                                                                                                                                                                                                                                         | 13.1 (per 1000)               | Pradilla G., et al. Pan American Journal of Public Health 2003; 14, 104–111. | -- |
| Brazil (Ribeirão Preto)                                                | Prevalence of cognitive and functional impairment in a community sample in Ribeirão Preto, Brazil                        | Cross-sectional survey - Prevalence of cognitive and functional impairment (CFI) | 1145 participants above 60 years old                                                                                  | CFI was associated with higher age, low education, stroke, epilepsy and depression.                                                                                                                                                                                        | 18.9 for CFI                  | Lopes MA., et al. Int J Geriatr Psychiatry 2007; 22:770–76                   | -- |
| Latin America (systematic review)                                      | The global prevalence of dementia : A systematic review and meta-analysis                                                | Systematic review and meta-analysis                                              | 135 publications (describing 147 studies) were fully eligible for inclusion in the review. Latin America (11 studies) | --                                                                                                                                                                                                                                                                         | 8.48(standardized prevalence) | Prince M, et al. Alzheimers Dement 2013;9(1):63-75.e2.                       | -- |
| Latin America (systematic review)                                      | Prevalence of dementia in the elderly in Latin America: A systematic review                                              | Systematic review of the literature                                              | 357 publications                                                                                                      | --                                                                                                                                                                                                                                                                         | 11                            | Zurique Sánchez C., et al. Rev Esp Geriatr Gerontol 2019.                    | -- |

|                               |                                                                                                                                                   |                                                                                                                                    |                                                                                                                                                  |                                                                                                                                                                                                                       |                 |                                                               |                                                                     |
|-------------------------------|---------------------------------------------------------------------------------------------------------------------------------------------------|------------------------------------------------------------------------------------------------------------------------------------|--------------------------------------------------------------------------------------------------------------------------------------------------|-----------------------------------------------------------------------------------------------------------------------------------------------------------------------------------------------------------------------|-----------------|---------------------------------------------------------------|---------------------------------------------------------------------|
| Brazil<br>(systematic review) | Reliability of Nationwide Prevalence Estimates of Dementia: A Critical Appraisal Based on Brazilian Surveys                                       | Search of PubMed, Latin-American databases, and a Brazilian thesis database for surveys focusing on dementia prevalence in Brazil. | Six population-based surveys. All but one evaluated large samples (>1000) and half of the studies included only subjects aged 65 years and older | Dementia prevalence was 15.2% after adjustment for accuracy of screening tests.                                                                                                                                       | 7.10            | Chaimowicz F., et al. PLoS One 2015; 10(7):e0131979           | The systematic review was registered at PROSPERO (CR D42014008 815) |
| Cuba (La Habana and Matanzas) | Incidence of dementia and association with APOE genotype in older Cubans                                                                          | Follow-up (average follow-up period of 4.5 years)                                                                                  | 1892                                                                                                                                             | Based on 10/66 dementia criteria, prevalence was of was 20.5 / 1000 whereas for DSM-IV dementia was 9.0/1000 person-years                                                                                             | 20.5 (per 1000) | Rodríguez JLL., et al. Dement Neuropsychol 2014; 8(4):356-363 | --                                                                  |
| Brazil (Ribeirão Preto)       | High prevalence of dementia in a community-based survey of older people from Brazil: association with intellectual activity rather than education | Cross-sectional and community-based survey                                                                                         | 1145 participants above 60 years old                                                                                                             | Alzheimer's disease was the main cause. Associated factor with dementia were: age, low education, stroke, absence of arthritis, and not reading books.                                                                | 5.90            | Lopes MA., et al. J Alzheimers Dis 2013; 32(2):307-16.        | --                                                                  |
| Colombia (Neiva)              | Dementia prevalence in Neiva district                                                                                                             | Cross-sectional                                                                                                                    | 643 participants above 60 years old                                                                                                              | Risk factors related to dementia prevalence were study level, harsh living conditions and some illnesses.                                                                                                             | 23.60           | Gooding M., et al. Acta Neurol Colombiana 2006; 22:243-248    | --                                                                  |
| Cuba (Havana)                 | The Prevalence, Correlates and Impact of Dementia in Cuba                                                                                         | Population-based cross-sectional surveys                                                                                           | 2944 participants above 65 years old                                                                                                             | Dementia was associated with older age, less education, a family history of dementia, shorter leg length and smaller skull circumference.                                                                             | 10.80           | Rodríguez JLL., et al., Neuroepidemiology 2008; 31(4):243-51  | --                                                                  |
| Mexico                        | Mexican Health and Aging Study and the The Cognitive Aging Ancillary Study (Mex-Cog)                                                              | Longitudinal study that examines the aging processes and its disease and disability burden in a large                              | 7000/2700                                                                                                                                        | Prevalence of 6.1% and 28.7% for dementia and cognitive impairment without dementia, respectively. Rates of dementia and cognitive impairment without dementia increased with advancing age and decreased with higher | 6.10            | Mejia-Arango S., et al. Aging Health 2011; 23(7):1050–1074.   | --                                                                  |

|                          |                                                                                                                      |                                                                                                                       |                                                                                                                                                                           |                                                                                                                                                                                                                                                                                |    |                                                                 |    |
|--------------------------|----------------------------------------------------------------------------------------------------------------------|-----------------------------------------------------------------------------------------------------------------------|---------------------------------------------------------------------------------------------------------------------------------------------------------------------------|--------------------------------------------------------------------------------------------------------------------------------------------------------------------------------------------------------------------------------------------------------------------------------|----|-----------------------------------------------------------------|----|
|                          |                                                                                                                      | representative panel of older Mexican. A subsample is being assessed using a harmonized cognitive assessment protocol |                                                                                                                                                                           | educational level; sex had a differential effect depending on the age strata. Hypertension, diabetes, and depression were risk factors for dementia but not for cognitive impairment without dementia.                                                                         |    |                                                                 |    |
| Brazil (Porto Alegre)    | Porto Alegre Longitudinal Aging study                                                                                | Longitudinal study from a large university hospital catchment area                                                    | 345 participants >60 years old at baseline - 7 PubMed publications                                                                                                        | The MCI annual conversion rate to AD was 8.5%. MCI was associated with significantly higher risk of conversion to AD (HR = 49.83, p = 0.004), after adjustment for age, education, sex and Mini-Mental State Examination score.                                                | -- | --                                                              | -- |
| Argentina (Buenos Aires) | Mild behavioral impairment and risk of dementia: a prospective cohort study of 358 patients.                         | Prospective cohort study                                                                                              | 358 elderly (>or= 65 years old) patients (239 with MCI and 119 with MBI) followed for up to 5 years until conversion to dementia or censoring.                            | 34% of MCI patients and over 70% of patients with MBI developed dementia. MBI patients without cognitive symptoms were more likely to develop dementia. MBI patients were more likely to develop frontotemporal dementia (FTD) than dementia of the Alzheimer's type (DAT).    | -- | Taragano FE., et al. J Clin Psychiatry 2009; Apr; 70(4):584-92. | -- |
| Argentina (Buenos Aires) | Economic impact of dementia in developing countries: an evaluation of costs of Alzheimer-type dementia in Argentina. | Cross-sectional study                                                                                                 | Eighty community-dwelling patients, 20 institutionalized AD patients and their respective primary caregivers, and 25 healthy elderly subjects participated in this study. | The annual direct costs of the disease increased with cognitive deterioration from US\$3420.40 in mild to US\$9657.60 in severe AD, and with institutionalization (US\$3189.20 outpatient vs. US\$14,447.68 institutionalized). Most direct costs were paid for by the family. | -- | Allegri RF., et al. Int Psychogeriatr. 2007 Aug; 19(4):705-18.  | -- |



|                          |                                                                                                                                               |                                             |                                      |                                                                                                                                                                                                                                               |                                 |                                                                                                                                                                                         |    |
|--------------------------|-----------------------------------------------------------------------------------------------------------------------------------------------|---------------------------------------------|--------------------------------------|-----------------------------------------------------------------------------------------------------------------------------------------------------------------------------------------------------------------------------------------------|---------------------------------|-----------------------------------------------------------------------------------------------------------------------------------------------------------------------------------------|----|
| Argentina (Buenos Aires) | A population-based study of cognitive impairment in socially vulnerable adults in Argentina. The Matanza Riachuelo study preliminary results. | Cross-sectional study                       | 2437                                 | The prevalence of CI among those over 60 was 26.4% (18.1% CIND and 8.3% dementia) with higher prevalence of dementia in younger individuals than rates reported in developed countries, probably due to low control of vascular risk factors. | --                              | Bartoloni L., et al. Dement Neuropsychol 2014; Oct-Dec;8(4):339-344.                                                                                                                    | -- |
| Argentina (Buenos Aires) | Epidemiological study of dementia population in Argentina                                                                                     | Cross-sectional study                       | 1453                                 | Prevalence of 23% in cognitive impairment. Cognitive impairment was associated with age, low education, head trauma, hypertension and depression.                                                                                             | --                              | Arizaga, R. et al. (2019). Deterioro cognitivo en mayores de 60 años en Cañuelas (Argentina). Resultados del piloto del estudio Ceibo (Estudio Epidemiológico poblacional de demencia). | -- |
| Brazil (Amazonas)        | Cognitive impairment in individuals with lower educational level and homogeneous sociocultural background                                     | Cross-sectional study                       | 163 participants above 50 years old  | Cognitive impairment was observed in 11.4%.                                                                                                                                                                                                   | 4.9 age > 50; and 12.3 age > 64 | Brucki SMD. et al. Dement Neuropsychol 2014.                                                                                                                                            | -- |
| Brazil (Florianópolis)   | Cognitive and functional impairment in an older community population from Brazil: The intriguing association with frequent pain               | Cross-sectional study                       | 1705 participants above 60 years old | Older age, presence of diabetes, heart disease, stroke, urinary incontinence, arthritis, frequent pain and depression were significantly associated with CFI.                                                                                 | 19.20                           | Lopes MA., et al. Archives of Gerontology and Geriatrics 2016; v.66, p.134 - 139.                                                                                                       | -- |
| Brazil (Florianópolis)   | Dementia in elderly inpatients admitted to medical wards in Brazil: diagnosis and comorbidity with other clinical diseases.                   | Cross sectional study (at General Hospital) | 224 participants above 60 years old  | Dementia was related to older age and the presence of delirium, stroke, and pneumonia.                                                                                                                                                        | 17.20                           | Maia E., et al. Psychogeriatrics 2016; 16: 177–184                                                                                                                                      | -- |

|                           |                                                                                                                                                         |                                                             |                                     |                                                                                                                                                                                                 |      |                                                                   |    |
|---------------------------|---------------------------------------------------------------------------------------------------------------------------------------------------------|-------------------------------------------------------------|-------------------------------------|-------------------------------------------------------------------------------------------------------------------------------------------------------------------------------------------------|------|-------------------------------------------------------------------|----|
| Brazil<br>(Florianópolis) | Delirium in elderly inpatients admitted to clinical wards<br>Prevalence and investigation of clinical conditions in a Brazilian sample.                 | Cross sectional study<br>(at General Hospital)              | 173 participants above 60 years old | Delirium was directly associated with Urinary Tract Infection, Renal Failure and Dementia.                                                                                                      | 17.9 | Pereira FDB., et al.<br>Neuropsychologia 2018; v.12, p.152 – 156. | -- |
| Brazil<br>(Tremembé)      | Incidence of Dementia and Mild Cognitive Impairment in a Brazilian population                                                                           | Longitudinal Study<br>(from Tremembé Epidemiological Study) | 520                                 | Ongoing                                                                                                                                                                                         | --   | --                                                                | -- |
| Costa Rica<br>(Heredia)   | Epidemiological Study of Cognitive Impairment of Older people in rural, urban, transition and outside regions<br>Great Metropolitan Area in Costa Rica. | Descriptive observational study                             | Pilot study of 101 cases.           | The average age of onset of memory problems was reported at 85 years in the case of the father, 87 years in the mother and 63 years in the case of siblings. 15.8% had a history of alcoholism. | --   | --                                                                | -- |

## Annex 2. LAC clinical trials

| ClinicalTrials.gov Identifier | Official Study title                                                                                                                                                                                                                            | Status                 | Study type                                                                                                                                                                                                                                                                                                            | Countries                                                                                | Representative Publications                                                                                                                                                                |
|-------------------------------|-------------------------------------------------------------------------------------------------------------------------------------------------------------------------------------------------------------------------------------------------|------------------------|-----------------------------------------------------------------------------------------------------------------------------------------------------------------------------------------------------------------------------------------------------------------------------------------------------------------------|------------------------------------------------------------------------------------------|--------------------------------------------------------------------------------------------------------------------------------------------------------------------------------------------|
| NCT01574053                   | Enroll -HD: A Prospective Registry Study in a Global Huntington's Disease Cohort                                                                                                                                                                | Recruiting             | Observational prospective                                                                                                                                                                                                                                                                                             | Argentina, Chile, Combia, other countries in North America, Europe and Oceania           | Landwehrmeyer et al. Mov Disord Clin Pract. 2016 Jun 22; 4(2):212-224.                                                                                                                     |
| NCT01055392                   | Disease-modifying Properties of Lithium in the Neurobiology of Alzheimer's Disease                                                                                                                                                              | Finished               | Interventional, phase II, RCT                                                                                                                                                                                                                                                                                         | Brazil                                                                                   | 1- Forlenza OV., et al. Br J Psychiatry 2019 Apr 5:1-7. 2- Aprahamian I., et al. J Clin Psychiatry 2014 Jul; 75(7):e672-8. 3- Forlenza OV., et al. Br J Psychiatry 2011 May; 198(5):351-6. |
| NCT01998841                   | A Study of Crenezumab Versus Placebo in Preclinical Presenilin1 (PSEN1) E280A Mutation Carriers to Evaluate Efficacy and Safety in the Treatment of Autosomal-Dominant Alzheimer's Disease (AD), Including a Placebo-Treated Non-Carrier Cohort | Active, not recruiting | Interventional, phase II, RCT                                                                                                                                                                                                                                                                                         | Colombia                                                                                 | Tariot PN., et al. Alzheimers Dement (N Y) 2018; 4:150-60.                                                                                                                                 |
| NCT02670083                   | CREAD Study: A Study of Crenezumab Versus Placebo to Evaluate the Efficacy and Safety in Participants With Prodromal to Mild Alzheimer's Disease (AD)                                                                                           | Active, not recruiting | Interventional, phase III, RCT                                                                                                                                                                                                                                                                                        | Costa Rica , Perú, Brazil, Argentina                                                     | This study was discontinued by the sponsor (Hoffman-La Roche), due to efficacy issues.                                                                                                     |
| NCT03443973                   | Safety and Efficacy Study of Gantenerumab in Participants With Early Alzheimer's Disease (AD)                                                                                                                                                   | Recruiting             | Interventional, phase III, RCT                                                                                                                                                                                                                                                                                        | Argentina, Chile, Mexico, Puerto Rico, other countries in North America, Europe and Asia | --                                                                                                                                                                                         |
| NCT01872598                   | Masitinib in Patients With Mild to Moderate Alzheimer's Disease                                                                                                                                                                                 | Active, no recruiting  | Interventional, phase III, RCT                                                                                                                                                                                                                                                                                        | Argentina, Brasil, Perú, other countries in Europe                                       | --                                                                                                                                                                                         |
| NCT01481558                   | Effects of a non-focal plasticity protocol on apathy in moderate Alzheimer's disease: a randomized, double-blind, sham-controlled trial.                                                                                                        | Finished               | Interventional, phase III, RCT                                                                                                                                                                                                                                                                                        | Brazil                                                                                   | Suemoto CK, et al. Brain Stimul. 2014 Mar-Apr; 7(2):308-13.                                                                                                                                |
| NCT00623103                   | Long-term Safety of Rivastigmine Capsule and Patch in Patients With Mild to Moderately-severe Dementia Associated With Parkinson's Disease (PDD)                                                                                                | Finished               | Interventional, phase III RCT: to provide long-term safety data for rivastigmine capsule and transdermal patch treatments, in particular the effect of rivastigmine on worsening of the underlying motor symptoms of Parkinson's Disease (PD), in patients with mild to moderately severe dementia associated with PD | Argentina, other countries in North America and Europe                                   | --                                                                                                                                                                                         |

|             |                                                                                                                                                                                                                           |                       |                                                                                                                                                                                                                                                                                                                                                              |                                                                                                              |                                                                                                                                                                                  |
|-------------|---------------------------------------------------------------------------------------------------------------------------------------------------------------------------------------------------------------------------|-----------------------|--------------------------------------------------------------------------------------------------------------------------------------------------------------------------------------------------------------------------------------------------------------------------------------------------------------------------------------------------------------|--------------------------------------------------------------------------------------------------------------|----------------------------------------------------------------------------------------------------------------------------------------------------------------------------------|
| NCT00322153 | A Randomized, Double-Blind, Placebo-Controlled Evaluation of the Safety and Efficacy of Memantine in Patients With Moderate-to-Severe Dementia of the Alzheimer's Type                                                    | Finished              | Interventional, phase III<br>RCT: To evaluate the safety, tolerability, and efficacy of memantine compared to placebo in outpatients diagnosed with moderate-to-severe dementia of the Alzheimer's type on a concurrent acetylcholinesterase inhibitor (AChEI).                                                                                              | Argentina, Mexico, other countries in North America, Europe, Asia and Oceania                                | --                                                                                                                                                                               |
| NCT01760005 | A Phase II/III Randomized, Double-Blind, Placebo-Controlled, Cognitive Endpoint, Multi-Center Study of Potential Disease Modifying Therapies in Individuals at Risk for and With Dominantly Inherited Alzheimer's Disease | Active, no recruiting | Interventional, phase II/III, RCT: to assess the safety, tolerability, biomarker and cognitive efficacy of investigational products in subjects who are known to have an Alzheimer's disease-causing mutation by determining if treatment with the study drug slows the rate of progression of cognitive impairment and improves disease-related biomarkers. | Argentina, Brazil, Colombia, Mexico, Puerto Rico, other countries in North America, Europe, Asia and Oceania | 1- Bateman RJ., et al N Engl J Med 2012 Aug 30; 367(9):795-804. Erratum in: N Engl J Med. 2012 Aug 23; 367(8):780. 2- Farlow M. et al. Alzheimers Dement. 2012 Jul; 8(4):261-71. |
| NCT01295957 | Phase 4 Study of a Reminiscence Program to Improve Quality of Life of Alzheimer's Disease Long Term Care Residents Using a Randomized Controlled Trial                                                                    | Finished              | Interventional, phase IV, RCT                                                                                                                                                                                                                                                                                                                                | Argentina                                                                                                    | --                                                                                                                                                                               |
| NCT02585934 | A Phase 3, Double-blind, Randomized Study of RVT-101 Versus Placebo When Added to Existing Stable Donepezil Treatment in Subjects With Mild to Moderate Alzheimer's Disease                                               | Finished              | Interventional, phase III, RCT: to confirm a demonstrated treatment effect of intepirdine (RVT-101) as an adjunctive therapy to donepezil for the treatment of subjects with Alzheimer's disease.                                                                                                                                                            | Argentina, Chile, other countries in North America, Europe, Asia and Oceania                                 | --                                                                                                                                                                               |
| NCT02956486 | A Placebo-Controlled, Double-Blind, Parallel-Group, 24 Month Study With an Open-Label Extension Phase to Evaluate the Efficacy and Safety of Elenbecestat (E2609) in Subjects With Early Alzheimer's Disease              | Recruiting            | Interventional, phase III, RCT                                                                                                                                                                                                                                                                                                                               | Argentina, other countries in North America, Europe, Asia and Oceania                                        | --                                                                                                                                                                               |
| NCT01799915 | Natural History Study of Synucleinopathies                                                                                                                                                                                | Recruiting            | Observational, prospective                                                                                                                                                                                                                                                                                                                                   | Argentina, other countries in North America, Europe and Asia                                                 | --                                                                                                                                                                               |

|             |                                                                                                                                                                                                                                                                                                                         |                                                                                                     |                                                    |                                                                                                           |                                                                                                                                                                                                  |
|-------------|-------------------------------------------------------------------------------------------------------------------------------------------------------------------------------------------------------------------------------------------------------------------------------------------------------------------------|-----------------------------------------------------------------------------------------------------|----------------------------------------------------|-----------------------------------------------------------------------------------------------------------|--------------------------------------------------------------------------------------------------------------------------------------------------------------------------------------------------|
| NCT03443973 | A Phase III, Multicenter, Randomized, Double-Blind, Placebo-Controlled, Parallel-Group, Efficacy, and Safety Study of Gantenerumab in Patients With Early (Prodromal to Mild) Alzheimer's Disease                                                                                                                       | Recruiting                                                                                          | Interventional, phase III, RCT                     | Argentina, Chile, Mexico, Puerto Rico, other countries in North America, Europe and Asia                  | --                                                                                                                                                                                               |
| NCT03131453 | A Randomized, Double-blind, Placebo-controlled, Parallel Group Study to Evaluate the Efficacy and Safety of CNP520 in Participants at Risk for the Onset of Clinical Symptoms of Alzheimer's Disease (AD).                                                                                                              | Recruiting                                                                                          | Interventional, phase III/III, RCT                 | Argentina, Chile, Mexico, Puerto Rico, other countries in North America, Europe, Asia, Africa and Oceania | --                                                                                                                                                                                               |
| NCT02586909 | A Long-Term, Open-Label Extension Study of the Safety and Tolerability of RVT-101 in Subjects With Alzheimer's Disease                                                                                                                                                                                                  | Terminated (Intepirdine did not meet its primary efficacy endpoints in lead-in study RVT-101-3001.) | Interventional, phase III, single group assignment | Argentina, Chile, other countries in North America, Europe, Asia and Oceania                              | --                                                                                                                                                                                               |
| NCT02079246 | An Open-label Extension Study to Evaluate the Long-term Safety and Tolerability of Idalopirdine (Lu AE58054) as Adjunctive Treatment to Donepezil in Patients With Mild-moderate Alzheimer's Disease                                                                                                                    | Finished                                                                                            | Interventional, phase III, non-randomized          | Argentina, Brazil, Chile, other countries in North America, Europe, Asia and Africa                       | --                                                                                                                                                                                               |
| NCT02006641 | Randomised, Double-blind, Parallel-group, Placebo-controlled, Fixed-dose Study of Idalopirdine in Patients With Mild-moderate Alzheimer's Disease Treated With Donepezil                                                                                                                                                | Finished                                                                                            | Interventional, phase III, RCT                     | Argentina, Brazil, other countries in North America, Europe and Asia                                      | 1- Cummings JL., et al. Alzheimers Res Ther. 2018 Nov 24; 10(1):116. 2- Atri A., et al. JAMA 2018 Jan 9; 319(2):130-142.                                                                         |
| NCT01955161 | Randomised, Double-blind, Parallel-group, Placebo-controlled, Fixed-dose Study of Idalopirdine in Patients With Mild - Moderate Alzheimer's Disease Treated With Donepezil                                                                                                                                              | Finished                                                                                            | Interventional, phase III, RCT                     | Argentina, Brazil, other countries in North America, Europe and Asia                                      | 1- Cummings JL., et al. Alzheimers Res Ther. 2018 Nov 24; 10(1):116. 2- Atri A., et al. JAMA 2018 Jan 9; 319(2):130-142.                                                                         |
| NCT01224106 | Multicenter, Randomized, Double-Blind, Placebo-Controlled, Parallel-Group Two Year Study to Evaluate the Effect of Subcutaneous RO4909832 on Cognition and Function in Prodromal Alzheimer's Disease With Option for up to an Additional Two Years of Treatment and an Open-Label Extension With Active Study Treatment | Active, no recruiting                                                                               | Interventional, phase III, RCT                     | Argentina, Brazil, Chile, Mexico, other countries in North America, Europe, Asia and Oceania              | 1- Ostrowitzki S., et al. Alzheimers Res Ther. 2017 Dec 8; 9(1):95. Erratum in: Alzheimers Res Ther. 2018 Sep 27; 10(1):99. 2- Delrieu J., et al. Expert Opin Biol Ther 2012 Aug; 12(8):1077-86. |
| NCT03114657 | A Phase III, Multicenter, Randomized, Double-Blind, Placebo-Controlled, Parallel-Group, Efficacy and Safety Study of Crenezumab in Patients With Prodromal to Mild Alzheimer's Disease                                                                                                                                  | Active, no recruiting                                                                               | Interventional, phase III, RCT                     | Argentina, Brazil, Perú, other countries in North America, Europe, Asia, Africa and Oceania.              | --                                                                                                                                                                                               |

|             |                                                                                                                                                                                                                                                                                                                        |                                                                                  |                                                    |                                                                                            |                                                                                                                                                                                                                                                                                                                                                                  |
|-------------|------------------------------------------------------------------------------------------------------------------------------------------------------------------------------------------------------------------------------------------------------------------------------------------------------------------------|----------------------------------------------------------------------------------|----------------------------------------------------|--------------------------------------------------------------------------------------------|------------------------------------------------------------------------------------------------------------------------------------------------------------------------------------------------------------------------------------------------------------------------------------------------------------------------------------------------------------------|
| NCT01127633 | Continued Efficacy and Safety Monitoring of Solanezumab, an Anti-Amyloid $\beta$ Antibody in Patients With Alzheimer's Disease                                                                                                                                                                                         | Terminated (Solanezumab did not meet the primary endpoint in study H8A-MC-LZAX.) | Interventional, phase III, RCT                     | Argentina, Brazil, other countries in North America, Europe, Asia.                         | --                                                                                                                                                                                                                                                                                                                                                               |
| NCT00905372 | Effect of LY2062430, an Anti-Amyloid Beta Monoclonal Antibody, on the Progression of Alzheimer's Disease as Compared With Placebo                                                                                                                                                                                      | Finished                                                                         | Interventional, phase III, RCT                     | Argentina, Brazil, other countries in North America, Asia.                                 | 1- Reed C., et al. <i>Alzheimers Res Ther.</i> 2018 Apr 3; 10(1):36. 2- Liu-Seifert H., et al. <i>J Alzheimers Dis.</i> 2015; 47(1):205-14. 3- Henley DB., et al. <i>Alzheimers Res Ther.</i> 2015 Jun 25; 7(1):43. 4- Liu-Seifert H., et al. <i>J Alzheimers Dis.</i> 2015; 43(3):949-55. 5- Doody RS., et al. <i>N Engl J Med.</i> 2014 Jan 23; 370(4):311-21. |
| NCT00710684 | Study AZ3110866, a Fixed Dose Study of SB-742457 Versus Placebo When Added to Existing Donepezil Treatment in Subjects With Mild-to-moderate Alzheimer's Disease                                                                                                                                                       | Finished                                                                         | Interventional, phase II, RCT                      | Argentina, Chile, other countries in North America, Europe, Oceania.                       | Maher-Edwards G., et al., <i>Alzheimers Dement (N Y)</i> . 2015 May 7; 1(1):23-36.                                                                                                                                                                                                                                                                               |
| NCT00490568 | An Open-label Extension to Study AVA102670 and AVA102672, to Assess the Long-term Safety and Efficacy of Rosiglitazone (Extended Release Tablets) as Adjunctive Therapy on Cognition in Subjects With Mild to Moderate Alzheimer's Disease.                                                                            | Terminated (Based on preliminary parent study results)                           | Interventional, phase III, single group assignment | Argentina, Chile, Mexico, other countries in North America, Africa, Asia, Europe, Oceania. | Harrington C., et al. <i>Curr Alzheimer Res.</i> 2011 Aug; 8(5):592-606.                                                                                                                                                                                                                                                                                         |
| NCT00348309 | A 54-week, Double-blind, Randomized, Placebo-controlled, Parallel-group Study to Investigate the Effects of Rosiglitazone (Extended Release Tablets) as Adjunctive Therapy to Donepezil on Cognition and Overall Clinical Response in APOE $\epsilon$ 4-stratified Subjects With Mild to Moderate Alzheimer's Disease. | Finished                                                                         | Interventional, RCT                                | Argentina, Brazil, Chile, Mexico, other countries in North America, Asia, Europe.          | Harrington C., et al. <i>Curr Alzheimer Res.</i> 2011 Aug; 8(5):592-606.                                                                                                                                                                                                                                                                                         |
| NCT00277810 | A 6-Month, Randomized, Double-Blind, Placebo-Controlled, Multicenter, Safety, Tolerability, and Efficacy Study of 3 Doses of Lecozotan (SRA-333) SR in Outpatients With Mild to Moderate Alzheimer's Disease Treated With a Cholinesterase Inhibitor                                                                   | Finished                                                                         | Interventional, phase II/III, RCT                  | Argentina, other countries in North America, Africa, Europe, Oceania.                      | --                                                                                                                                                                                                                                                                                                                                                               |
| NCT00151398 | A 3-Month, Randomized, Double-Blind, Placebo-Controlled, Multicenter, Safety, Tolerability, and Efficacy Study Of 3 Doses Of Lecozotan (SRA-333) SR In Outpatients With Mild To Moderate Alzheimer's Disease With Donepezil As Active Control.                                                                         | Finished                                                                         | Interventional, phase II, RCT                      | Argentina, Australia, Canada, South Africa, United States                                  | --                                                                                                                                                                                                                                                                                                                                                               |

|             |                                                                                                                                                                                                                                                         |                                                                      |                                               |                                                                                              |                                                                                                                                                                                                                                                                                                                                                                                               |
|-------------|---------------------------------------------------------------------------------------------------------------------------------------------------------------------------------------------------------------------------------------------------------|----------------------------------------------------------------------|-----------------------------------------------|----------------------------------------------------------------------------------------------|-----------------------------------------------------------------------------------------------------------------------------------------------------------------------------------------------------------------------------------------------------------------------------------------------------------------------------------------------------------------------------------------------|
| NCT00895895 | A 52-Week, Two-Period, Multicenter, Randomized, Double-Blind, Donepezil-Referenced, Placebo-Controlled, Efficacy And Safety Study Of 3 Dosage Levels Of SAM-531 In Outpatients With Mild To Moderate Alzheimer Disease                                  | Terminated (all of the 3 SAM-531 dosage levels were declared futile) | Interventional, phase II, RCT                 | Argentina, Chile, Colombia, Mexico, other countries in North America, Asia, Europe, Oceania. | --                                                                                                                                                                                                                                                                                                                                                                                            |
| NCT00884507 | A Dose-ranging, Randomized, Double-blind, Placebo-controlled Study of the Effect of RO5313534, Used as add-on Therapy to Donepezil, on Cognitive Function in Patients With Mild to Moderate Symptoms of Alzheimer's Disease                             | Finished                                                             | Interventional, phase II, parallel assignment | Argentina, Mexico, other countries in North America, Europe, Oceania.                        | --                                                                                                                                                                                                                                                                                                                                                                                            |
| NCT00676143 | A Phase Iii, Multicenter, Randomized, Double-blind, Placebo-controlled, Parallel Group, Efficacy And Safety Trial Of Bapineuzumab (Aab 001, Eln115727) In Subjects With Mild To Moderate Alzheimer Disease Who Are Apolipoprotein E 4 Carriers          | Terminated (2 large Phase 3 studies showed no clinical benefit)      | Interventional, phase III, RCT                | Argentina, Chile, Mexico, other countries in North America, Europe, Africa, Oceania.         | 1- Vandenberghe R. et al. Alzheimers Res Ther. 2016 May 12; 8(1):18. 2- Lacey L., et al. Value Health. 2015 Jul; 18(5):638-45. 3- Doody RS., et al. N Engl J Med. 2013 Jul 25; 369(4):341-50. 4- Liu-Seifert H., et al. J Alzheimers Dis. 2015; 47(1):205-14. 5- Doody RS., et al. Alzheimers Res Ther. 2015 Jun 10; 7(1):36. 6. Henley DB., et al. Alzheimers Res Ther. 2015 Jun 25;7(1):43. |
| NCT00594568 | Effect of $\gamma$ -Secretase Inhibition on the Progression of Alzheimer's Disease: LY450139 Versus Placebo                                                                                                                                             | Finished                                                             | Interventional, phase III, RCT                | Argentina, Chile, other countries in North America, Europe, Africa, Asia, Oceania.           | ----                                                                                                                                                                                                                                                                                                                                                                                          |
| NCT02051608 | A Phase III, Randomized, Double-Blind, Placebo-Controlled, Parallel-Group, Multicenter, Efficacy and Safety Study of Gantenerumab in Patients With Mild Alzheimer's Disease; Part II: Open-Label Extension For Participating Patients                   | Active, no recruiting                                                | Interventional, phase III, RCT                | Argentina, Guatemala, other countries in North America, Europe, Asia, Oceania.               | --                                                                                                                                                                                                                                                                                                                                                                                            |
| NCT00667810 | A Phase 3, Multicenter, Randomized, Double-blind, Placebo-controlled, Parallel-group Efficacy And Safety Trial Of Bapineuzumab (Aab-001, Eln115727) In Subjects With Mild to Moderate Alzheimer Disease Who Are Apolipoprotein E 4 Non-carriers         | Terminated (2 large Phase 3 studies showed no clinical benefit)      | Interventional, phase III, RCT                | Argentina, Chile, Mexico, other countries in North America, Europe, Africa, Asia, Oceania.   | 1- Vandenberghe R., et al. Alzheimers Res Ther. 2016 May 12; 8(1):18. 2- Lacey L., et al. Value Health. 2015 Jul; 18(5):638-45.                                                                                                                                                                                                                                                               |
| NCT00297414 | An Analysis of Mortality in Subjects Who Participated in Three Studies of Galantamine in Mild Cognitive Impairment                                                                                                                                      | Finished                                                             | Observational, retrospective                  | Argentina, other countries in North America, Europe, Asia, Oceania.                          | --                                                                                                                                                                                                                                                                                                                                                                                            |
| NCT00998764 | A Phase 3 Extension, Multicenter, Long Term Safety And Tolerability Trial Of Bapineuzumab (Aab 001, Eln115727) In Subjects With Alzheimer Disease Who Are Apolipoprotein E 4 Carriers And Participated In Study 3133k1-3001-us Or Study 3133k1-3001-ww. | Terminated (2 large Phase 3 studies showed no clinical benefit)      | Interventional, phase III, non-randomized     | Argentina, Chile, other countries in North America, Europe, Africa, Asia, Oceania.           | Ivanou A., et al. Alzheimers Res Ther. 2016 Jun 23;8(1):24.                                                                                                                                                                                                                                                                                                                                   |

|             |                                                                                                                                                                                                                |            |                                         |                                                                      |                                                                                                                                                                                                                                                                                                                                                                                                                                                                                   |
|-------------|----------------------------------------------------------------------------------------------------------------------------------------------------------------------------------------------------------------|------------|-----------------------------------------|----------------------------------------------------------------------|-----------------------------------------------------------------------------------------------------------------------------------------------------------------------------------------------------------------------------------------------------------------------------------------------------------------------------------------------------------------------------------------------------------------------------------------------------------------------------------|
|             |                                                                                                                                                                                                                | benefit)   |                                         |                                                                      |                                                                                                                                                                                                                                                                                                                                                                                                                                                                                   |
| NCT00869817 | Dominantly Inherited Alzheimer Network (DIAN)                                                                                                                                                                  | Recruiting | Observational, prospective              | Argentina, other countries in North America, Europe, Asia, Oceania.  | 1- Mintun MA., et al. Neurology. 2006 Aug 8; 67(3):446-52. 2- Fagan AM., et al. Arch Neurol. 2007 Mar; 64(3):343-9. 3- Godbolt AK., et al. Neurocase. 2005 Feb; 11(1):56-64. 4- Morris JC., et al. Neurology. 1991 Apr; 41(4):469-78. 5- Galvin JE., et al Arch Neurol. 2005 May; 62(5):758-65. 6- Gordon BA., et al Lancet Neurol. 2018 Mar; 17(3):241-250. 7- Bateman RJ., et al. N Engl J Med. 2012 Aug 30; 367(9):795-804. Erratum in: N Engl J Med. 2012 Aug 23; 367(8):780. |
| NCT01574053 | Enroll -HD: A Prospective Registry Study in a Global Huntington's Disease Cohort                                                                                                                               | Recruiting | Observational, prospective              | Argentina, Chile, other countries in North America, Europe, Oceania. | Landwehrmeyer GB., et al. Mov Disord Clin Pract. 2016 Jun 22; 4(2):212-224.                                                                                                                                                                                                                                                                                                                                                                                                       |
| NCT03260608 | Randomized Clinical Assessment to Evaluate the Effectiveness of a Psychoeducation and Support Protocol by Telephone, in the Aid of Caregivers of Patients With Dementia in Specialized Ambulatory Accompanying | Recruiting | Interventional, RCT                     | Brazil                                                               | --                                                                                                                                                                                                                                                                                                                                                                                                                                                                                |
| NCT01481558 | Effects of Transcranial Direct Current Stimulation on the Apathy of Alzheimer's: a Randomized, Sham-controlled Clinical Trial                                                                                  | Finished   | Interventional, phase II, RCT           | Brazil                                                               | 1- Suemoto CK., et al. Brain Stimul. 2014 Mar-Apr; 7(2):308-13. 2- Robertson K., et al. Clin Infect Dis. 2012 Sep; 55(6):868-76. 3- Albright AV., et al. J Neurovirol. 2003 Apr; 9(2):222-7. 4- McArthur JC., et al. J Neurovirol. 2003 Apr; 9(2):205-21. 5- Sacktor N. J Neurovirol. 2002 Dec; 8 Suppl 2:115-21.                                                                                                                                                                 |
| NCT02222181 | Impact of Pharmacotherapy Management in Patients With Alzheimer's Disease                                                                                                                                      | Finished   | Interventional, single-group assignment | Brazil                                                               | --                                                                                                                                                                                                                                                                                                                                                                                                                                                                                |
| NCT03075241 | Z-Drugs for the Treatment of Sleep Disorders in Alzheimer's Disease: a Randomised, Double-blind, Placebo-controlled Study                                                                                      | Recruiting | Interventional, phase III, RCT          | Brazil                                                               | --                                                                                                                                                                                                                                                                                                                                                                                                                                                                                |
| NCT01515982 | Physical Exercise as an Additional Treatment for Alzheimer Disease                                                                                                                                             | Finished   | Interventional, RCT                     | Brazil                                                               | --                                                                                                                                                                                                                                                                                                                                                                                                                                                                                |
| NCT00480870 | The Effect of Anticholinesterase Drugs on Sleep in Alzheimer's Disease Patients                                                                                                                                | Finished   | Interventional, phase IV, RCT           | Brazil                                                               | 1- Strand LM., et al. Drug Intell Clin Pharm. 1988 Jan; 22(1):63-7. 2- Lanctôt KL., et al. CMAJ. 2003 Sep 16; 169(6):557-64. 3- Arlt S., et al. Drugs Aging. 2008; 25(12):1033-47. 4- Rosa A., et al. Cell Mol Life Sci. 2007 May; 64(10):1244-53. 5- Moraes W., et al. Chest. 2008 Mar; 133(3):677-83. 6- Lucchesi LM., et al. Braz J Psychiatry. 2005 May; 27 Suppl 1:27-32. 7- Moraes Wdos S., et al. Sleep. 2006 Feb; 29(2):199-205.                                          |
| NCT01142258 | Trazodone for the Treatment of Sleep Disorders in Alzheimer's Disease: a Randomised, Double-blind, Placebo-controlled Study                                                                                    | Finished   | Interventional, phase III, RCT          | Brazil                                                               | Camargos EF., et al. Am J Geriatr Psychiatry. 2014 Dec; 22(12):1565-74.                                                                                                                                                                                                                                                                                                                                                                                                           |



|             |                                                                                                                                                                     |                       |                                         |        |                                                                                                                                                                                                                                                                                                                                                                                                                                                                                                                                                                                                                                                                                                                     |
|-------------|---------------------------------------------------------------------------------------------------------------------------------------------------------------------|-----------------------|-----------------------------------------|--------|---------------------------------------------------------------------------------------------------------------------------------------------------------------------------------------------------------------------------------------------------------------------------------------------------------------------------------------------------------------------------------------------------------------------------------------------------------------------------------------------------------------------------------------------------------------------------------------------------------------------------------------------------------------------------------------------------------------------|
|             | Dose-Response Evaluation of the Investigational Product Cellavita HD After Intravenous Administration in Patients With Huntington's Disease                         | Recruiting            | Interventional, phase II, RCT           | Brazil | 1- Weiss A., et al. J Clin Invest. 2012 Oct; 122(10):3731-6. 2- Aleynik A., et al. Clin Transl Med. 2014 Jul 19; 3: 24. 3- de Almeida FM., et al. J Neurotrauma. 2011 Sep; 28(9):1939-49. 4- Barker RA., et al. J Neurol Neurosurg Psychiatry. 2013 Jun; 84(6):657-65. 5- Bonelli RM., et al. Curr Pharm Des. 2006; 12(21):2701-20. 6- de Souza PV., et al. Anat Rec (Hoboken). 2013 Dec; 296(12):1923-8. 7- Fink KD., et al. Regen Med. 2015; 10(5):623-46. 8- Kerkis I., et al. Tissue Eng Part B Rev. 2012 Apr; 18(2):129-38. 9- Ross CA., et al. Nat Rev Neurol. 2014 Apr; 10(4):204-16. 10- Kaplan A., et al. Prog Neurobiol. 2012 Dec; 99(3):262-80.                                                          |
| NCT02728115 | First in Human Study to Evaluate Safety of Cellavita HD Investigational Product After Intravenous Application in Participants With Huntington's Disease             | Active, no recruiting | Interventional, phase I, non-randomized | Brazil | 1- Adam OR., et al. Neurotherapeutics. 2008 Apr; 5(2):181-97. 2- Aleynik A., et al. Clin Transl Med. 2014 Jul 19; 3:24. 3- de Almeida FM., et al. J Neurotrauma. 2011 Sep; 28(9):1939-49. 4- Bachoud-Lévi AC., et al. Lancet Neurol. 2006 Apr; 5(4):303-9. 5- Bachoud-Lévi AC., et al. Lancet. 2000 Dec 9; 356(9246): 1975-9. 6- Ball LM., et al. Br J Haematol. 2013 Nov; 163(4):501-9. 7- Barker RA., et al. J Neurol Neurosurg Psychiatry. 2013 Jun; 84(6):657-65.                                                                                                                                                                                                                                               |
| NCT03252535 | Dose-Response Evaluation of the Investigational Product Cellavita HD After Intravenous Administration in Patients With Huntington's Disease                         | Recruiting            | Interventional, phase II, RCT           | Brazil | 1- Aleynik A., et al. Clin Transl Med. 2014 Jul 19; 3:24. 2- Aleynik A., et al. Clin Transl Med. 2014 Jul 19; 3:24. 3- de Almeida FM., et al. J Neurotrauma. 2011 Sep;28(9):1939-49. 4- Barker RA., et al. J Neurol Neurosurg Psychiatry. 2013 Jun; 84(6):657-65. 5- Bonelli RM., et al. Curr Pharm Des. 2006; 12(21):2701-20. 6- de Souza PV., et al. Anat Rec (Hoboken). 2013 Dec; 296(12):1923-8. 7- Fink KD., et al. Regen Med. 2015; 10(5):623-46. 8- Kerkis I., et al. Tissue Eng Part B Rev. 2012 Apr; 18(2):129-38. 9- Ross CA., et al. Nat Rev Neurol. 2014 Apr; 10(4):204-16. 10- Kaplan A., et al. Prog Neurobiol. 2012 Dec; 99(3):262-80. 11- Weiss A., et al. J Clin Invest. 2012 Oct; 122(10):3731-6. |
| NCT01183806 | Effects of Exercise and Rivastigmine on Quality of Life of Alzheimer's Disease Patients                                                                             | Finished              | Interventional, phase III, RCT          | Brazil | Aguiar P., et al. Curr Alzheimer Res. 2014; 11(6):532-7.                                                                                                                                                                                                                                                                                                                                                                                                                                                                                                                                                                                                                                                            |
| NCT01978353 | Episodic Memory Training for Face Name Association in Patients With Amnesic Mild Cognitive Impairment: Cognitive Measures and Functional Resonance Magnetic Imaging | Finished              | Interventional, RCT                     | Brazil | --                                                                                                                                                                                                                                                                                                                                                                                                                                                                                                                                                                                                                                                                                                                  |

|             | Outcomes                                                                                                                                                                                                                                                                                                                                                  |            |                                |                                                                                                         |                                                                                                                                 |
|-------------|-----------------------------------------------------------------------------------------------------------------------------------------------------------------------------------------------------------------------------------------------------------------------------------------------------------------------------------------------------------|------------|--------------------------------|---------------------------------------------------------------------------------------------------------|---------------------------------------------------------------------------------------------------------------------------------|
| NCT01286389 | Caloric Restriction in Obese Patients With Mild Cognitive Impairment: Effects on Adiposity, Comorbidity and Cognition                                                                                                                                                                                                                                     | Finished   | Interventional, RCT            | Brazil                                                                                                  | --                                                                                                                              |
| NCT02626572 | Efficacy and Safety of 3 Doses of S47445 Versus Placebo in Patients With Alzheimer's Disease at Mild to Moderate Stages With Depressive Symptoms. A 24-week International, Multi-centre, Randomized, Double-blind, Placebo-controlled Phase II Study in Monotherapy Followed by an Optional 28-week Extension Period in Co-administration With Donepezil. | Finished   | Interventional, phase II, RCT  | Brazil, Chile, Mexico, Africa, Europe.                                                                  | --                                                                                                                              |
| NCT03444870 | A Phase III, Multicenter, Randomized, Double-Blind, Placebo-Controlled, Parallel-Group, Efficacy, and Safety Study of Gantenerumab in Patients With Early (Prodromal to Mild) Alzheimer's Disease                                                                                                                                                         | Recruiting | Interventional, phase III, RCT | Brazil, Colombia, Peru, other countries in North America, Asia, Europe, Oceania.                        | --                                                                                                                              |
| NCT02006654 | Randomised, Double-blind, Parallel-group, Placebo-controlled Study of Idalopirdine in Patients With Mild - Moderate Alzheimer's Disease Treated With an Acetylcholinesterase Inhibitor                                                                                                                                                                    | Finished   | Interventional, phase III, RCT | Brazil, Mexico, other countries in North America, Asia, Europe, Oceania.                                | 1- Cummings JL., et al. Alzheimers Res Ther. 2018 Nov 24; 10(1):116. 2- Atri A., et al. JAMA. 2018 Jan 9; 319(2):130-142.       |
| NCT00762411 | Effect of LY450139 a $\gamma$ -Secretase Inhibitor, on the Progression of Alzheimer's Disease as Compared With Placebo                                                                                                                                                                                                                                    | Finished   | Interventional, phase III, RCT | Brazil, Mexico, other countries in North America, Asia, Europe.                                         | 1- Liu-Seifert H., et al. J Alzheimers Dis. 2015; 47(1):205-14 2- Henley DB., et al. Alzheimers Res Ther. 2015 Jun 25; 7(1):43. |
| NCT03325556 | A Double-blind, Placebo-controlled, Relapse Prevention Study of Pimavanserin for the Treatment of Hallucinations and Delusions Associated With Dementia-related Psychosis                                                                                                                                                                                 | Recruiting | Interventional, phase III, RCT | Chile, other countries in North America, Europe.                                                        | --                                                                                                                              |
| NCT00322153 | A Randomized, Double-Blind, Placebo-Controlled Evaluation of the Safety and Efficacy of Memantine in Patients With Moderate-to-Severe Dementia of the Alzheimer's Type                                                                                                                                                                                    | Finished   | Interventional, phase III, RCT | Argentina, Chile, Mexico, other countries in North America.                                             | --                                                                                                                              |
| NCT00099242 | Efficacy and Safety of the Rivastigmine Transdermal Patch in Patients With Probable Alzheimer's Disease                                                                                                                                                                                                                                                   | Finished   | Interventional, phase III, RCT | Chile, Guatemala, Mexico, Peru, Puerto Rico, Venezuela, other countries in North America, Asia, Europe. | Lefèvre G., et al. Int J Geriatr Psychiatry. 2011 Apr; 26(4):356-63.                                                            |
| NCT00954590 | CONTACT: A Phase 3 Multicenter, Randomized, Double-Blind, Placebo-Controlled, Six-Month Safety and Efficacy Study of Dimebon in Patients With Moderate-to-Severe Alzheimer's Disease                                                                                                                                                                      | Finished   | Interventional, phase III, RCT | Chile, Europe.                                                                                          | --                                                                                                                              |
| NCT02585934 | A Phase 3, Double-blind, Randomized Study of RVT-101 Versus Placebo When Added to Existing Stable Donepezil Treatment in Subjects With Mild to Moderate Alzheimer's Disease                                                                                                                                                                               | Finished   | Interventional, phase III, RCT | Argentina, Chile, other countries in North America, Asia, Europe, Oceania.                              | --                                                                                                                              |

|             |                                                                                                                                                                                                                                                                                                                         |                                                        |                                |                                                                                             |                                                                           |
|-------------|-------------------------------------------------------------------------------------------------------------------------------------------------------------------------------------------------------------------------------------------------------------------------------------------------------------------------|--------------------------------------------------------|--------------------------------|---------------------------------------------------------------------------------------------|---------------------------------------------------------------------------|
| NCT03036280 | A Placebo-Controlled, Double-Blind, Parallel-Group, 24 Month Study to Evaluate the Efficacy and Safety of E2609 in Subjects With Early Alzheimer's Disease                                                                                                                                                              | Recruiting                                             | Interventional, phase III, RCT | Chile, Mexico, other countries in North America, Asia, Europe, Asia, Africa, Europe.        | --                                                                        |
| NCT00930059 | A Phase 2 Multicenter, Double-Blind, Placebo-Controlled, Parallel Group Study Of PF-04447943 In Subjects With Mild To Moderate Alzheimer's Disease                                                                                                                                                                      | Finished                                               | Interventional, phase II, RCT  | Chile, other countries in North America, Europe.                                            | --                                                                        |
| NCT02992132 | A Double-Blind, Placebo-Controlled Study to Examine the Safety and Efficacy of Pimavanserin for the Treatment of Agitation and Aggression in Alzheimer's Disease                                                                                                                                                        | Finished                                               | Interventional, phase II, RCT  | Chile, other countries in North America, Europe.                                            | --                                                                        |
| NCT00708552 | Study AZ3110865, a Study Comparing SB-742457 or Donepezil Versus Placebo in Subjects With Mild-to-moderate Alzheimer's Disease                                                                                                                                                                                          | Finished                                               | Interventional, phase II, RCT  | Chile, Mexico, other countries in Europe, Asia and Africa                                   | Maher-Edwards G., et al. Alzheimers Dement (N Y). 2015 May 7; 1(1):23-36. |
| NCT00428090 | A 24-week, Double-blind, Double-dummy, Randomized, Parallel-group Study to Investigate the Effects of Rosiglitazone (Extended Release Tablets), Donepezil, and Placebo as Monotherapy on Cognition and Overall Clinical Response in APOE ε4-stratified Subjects With Mild to Moderate Alzheimer's Disease. (REFLECT-1)  | Finished                                               | Interventional, phase III, RCT | Chile, Mexico, Peru, Puerto Rico, other countries in North America, Asia, Europe, Oceania.  | Gold M., et al. Dement Geriatr Cogn Disord. 2010; 30(2):131-46.           |
| NCT03118947 | A 52-Week Open-Label Extension Study of Pimavanserin for the Treatment of Agitation and Aggression in Subjects With Alzheimer's Disease                                                                                                                                                                                 | Finished                                               | Interventional, phase II, RCT  | Chile, other countries in North America, Europe.                                            | --                                                                        |
| NCT01009255 | A Randomised, Double-blind, Placebo-controlled Study to Evaluate the Efficacy and Safety of the H3 Receptor Antagonist, GSK239512 in Subjects With Mild to Moderate Alzheimer's Disease.                                                                                                                                | Finished                                               | Interventional, phase II, RCT  | Chile, Asia, Europe.                                                                        | --                                                                        |
| NCT01712074 | A Randomized, 18-week, Placebo-controlled, Double-blind, Parallel Group Study Of The Safety And Efficacy Of Pf-05212377 (Sam-760) In Subjects With Mild-to-moderate Alzheimer's Disease With Existing Neuropsychiatric Symptoms On A Stable Daily Dose Of Donepezil                                                     | Terminated                                             | Interventional, phase II, RCT  | Chile, other countries of North America, Europe.                                            | Fullerton T., et al. Alzheimers Res Ther. 2018 Apr 5; 10(1):38.           |
| NCT01035138 | Multicenter, Randomized, Double-Blind, Placebo-Controlled, Parallel-Group Two Year Study to Evaluate the Effect of Subcutaneous RO4909832 on Cognition and Function in Prodromal Alzheimer's Disease With Option for up to an Additional Two Years of Treatment and an Open-Label Extension With Active Study Treatment | Active, no recruiting                                  | Interventional, phase III, RCT | Chile, other countries of North America, Asia, Africa, Europe, Oceania.                     | --                                                                        |
| NCT00550420 | An Open-label Extension to Study AVA105640, to Assess the Long-term Safety and Efficacy of Rosiglitazone (Extended Release Tablets) on Cognition in Subjects With Mild to Moderate Alzheimer's Disease.                                                                                                                 | Terminated (Based on preliminary parent study results) | Interventional, phase III, RCT | Chile, Mexico, Peru, Puerto Rico, Mexico, other countries in North America, Europe and Asia | Gold M., et al. Dement Geriatr Cogn Disord. 2010; 30(2):131-46.           |

|             |                                                                                                                                                                                                                                                                                                                                   |                                                                                                                        |                                   |                                                                                |                                                                            |
|-------------|-----------------------------------------------------------------------------------------------------------------------------------------------------------------------------------------------------------------------------------------------------------------------------------------------------------------------------------|------------------------------------------------------------------------------------------------------------------------|-----------------------------------|--------------------------------------------------------------------------------|----------------------------------------------------------------------------|
| NCT00348192 | A Double-Blind, Randomised, Placebo-Controlled, Parallel Group Study to Investigate the Effects of SB-742457, Donepezil and Placebo on Cognition in Subjects With Mild to Moderate Alzheimer's Disease                                                                                                                            | Finished                                                                                                               | Interventional, phase II, RCT     | Chile, and other countries in Europe                                           | Maher-Edwards G., et al. Int J Geriatr Psychiatry. 2011 May; 26(5):536-44. |
| NCT00224497 | A Phase IIa/b Double-blind, Randomised, Placebo-controlled, Linear Trend Design Dose-ranging Study to Investigate the Effects of 24 Weeks of Monotherapy With SB-742457 on Cognition in Subjects With Mild to Moderate Alzheimer's Disease                                                                                        | Finished                                                                                                               | Interventional, phase II, RCT     | Chile, other countries in Europe, Africa and Asia                              | --                                                                         |
| NCT00996918 | A Phase 3 Extension, Multicenter, Double-Blind, Long-Term Safety And Tolerability Trial Of Bapineuzumab (AAB-001, ELN115727) In Subjects With Alzheimer Disease Who Are Apolipoprotein E e4 Noncarriers And Participated In Study 3133K1-3000                                                                                     | Terminated (2 large Phase 3 studies showed no clinical benefit)                                                        | Interventional, phase III, RCT    | Chile, other countries in North America, Europe, Asia, Africa and Oceania      | Ivanou A., et al. Alzheimers Res Ther. 2016 Jun 23; 8(1):24.               |
| NCT01998841 | A Double-Blind, Placebo-Controlled Parallel-Group Study in Preclinical PSEN1 E280A Mutation Carriers Randomized to Crenezumab or Placebo, and in Non-Randomized, Placebo-Treated Non-Carriers From the Same Kindred, to Evaluate the Efficacy and Safety of Crenezumab in the Treatment of Autosomal-Dominant Alzheimer's Disease | Active, no recruiting                                                                                                  | Interventional, phase II, RCT     | Colombia                                                                       | --                                                                         |
| NCT02670083 | A Phase III, Multicenter, Randomized, Double-Blind, Placebo-Controlled, Parallel-Group, Efficacy And Safety Study of Crenezumab in Patients With Prodromal to Mild Alzheimer's Disease                                                                                                                                            | Active, no recruiting                                                                                                  | Interventional, phase III, RCT    | Costa Rica, Mexico, other countries in North America, Europe, Asia and Oceania | --                                                                         |
| NCT02569398 | A Phase 2b/3 Randomized, Double-blind, Placebo-Controlled, Parallel Group, Multicenter Study Investigating the Efficacy and Safety of JNJ-54861911 in Subjects Who Are Asymptomatic At Risk for Developing Alzheimer's Dementia                                                                                                   | Finished                                                                                                               | Interventional, phase II/III, RCT | Mexico, other countries in North America, Europe, Asia and Oceania             | --                                                                         |
| NCT02783573 | A Randomized, Double-Blind, Placebo-Controlled and Delayed-Start Study of LY3314814 in Mild Alzheimer's Disease Dementia                                                                                                                                                                                                          | Terminated (An independent assessment concluded the trial was not likely to meet the primary endpoint upon completion) | Interventional, phase III, RCT    | Mexico, other countries in North America, Europe and Asia                      | Cebers G., et al. J Alzheimers Dis. 2017; 55(3):1039-1053.                 |

|             |                                                                                                                                                                                                                                                                                                                                                            |                                                                                                            |                                                    |                                                                                                                            |                                                              |
|-------------|------------------------------------------------------------------------------------------------------------------------------------------------------------------------------------------------------------------------------------------------------------------------------------------------------------------------------------------------------------|------------------------------------------------------------------------------------------------------------|----------------------------------------------------|----------------------------------------------------------------------------------------------------------------------------|--------------------------------------------------------------|
| NCT01969123 | A Randomized, Double-blind, Placebo-controlled, Parallel-Group, 26-Week, Phase 3 Study of 2 Doses of EVP-6124 or Placebo in Subjects With Mild to Moderate Alzheimer's Disease Currently or Previously Receiving an Acetylcholinesterase Inhibitor Medication                                                                                              | Terminated (Study has been suspended due to clinical hold)                                                 | Interventional, phase III, RCT                     | Mexico, Australia, Belgium, Canada, France, Germany, Italy, Korea, Republic of, Poland, South Africa, Spain, United States | --                                                           |
| NCT02537626 | An Evaluation of the Effect of the Erchonia ALS on Alzheimer's Disease                                                                                                                                                                                                                                                                                     | Not yet recruiting                                                                                         | Interventional, RCT                                | Mexico                                                                                                                     | --                                                           |
| NCT03491150 | A Multicenter, Open-Label, Long-Term Extension Of Phase III Studies (BN29552/BN29553) Of Crenezumab In Patients With Alzheimer's Disease                                                                                                                                                                                                                   | Active, no recruiting                                                                                      | Interventional, phase III, single group assignment | Mexico, other countries in North America, Europe, Asia and Oceania                                                         | --                                                           |
| NCT03906903 | Transcranial Magnetic Stimulation and Cognitive Stimulation in Mild Cognitive Impairment                                                                                                                                                                                                                                                                   | Recruiting                                                                                                 | Interventional, RCT                                | Mexico                                                                                                                     | --                                                           |
| NCT03036280 | A 24-Month Study to Evaluate the Efficacy and Safety of E2609 in Subjects With Early Alzheimer's Disease_ (MissionAD2)                                                                                                                                                                                                                                     | Recruiting                                                                                                 | Interventional, phase III, RCT                     | Chile, Mexico, other countries in North America, Europe and Asia                                                           | --                                                           |
| NCT01024660 | A Randomised, Double-blind, Placebo-controlled, Parallel Design, Multicentre Study in Patients With Mild to Moderate Alzheimer's Disease to Investigate the Effect on Cognitive Function as Measured by Repeated CogState Testing in Relation to Effects on Traditional Cognitive Measures After 12 Weeks                                                  | Finished                                                                                                   | Interventional, early phase I, RCT                 | Peru, other countries in North America, Europe and Africa                                                                  | Karin A., et al. Acta Neurol Scand. 2014 Feb; 129(2):114-22. |
| NCT03305809 | Effect of LY3154207 on Cognition in Mild-to-Moderate Dementia Due to Lewy Body Dementia (LBD) Associated With Idiopathic Parkinson's Disease (PD) or Dementia With Lewy Bodies (DLB)                                                                                                                                                                       | Recruiting                                                                                                 | Interventional, phase II, RCT                      | Puerto Rico, other countries in North America                                                                              | --                                                           |
| NCT00948766 | A 24 Week, Prospective, Randomized, Parallel-group, Double-blind, Multi-center Study (ENA713DUS44) Comparing the Effects of Rivastigmine Patch 15 cm^2 vs. Rivastigmine Patch 5 cm^2 on ACTivities of Daily Living and CognitIOn in Patients With Severe Dementia of the Alzheimer's Type (ACTION) and a 24-week Open-label Extension to Study ENA713DUS44 | Finished                                                                                                   | Interventional, phase IV, RCT                      | Puerto Rico, United States                                                                                                 | Grossberg GT., et al. Curr Alzheimer Res. 2015; 12(1):53-60. |
| NCT02972658 | A Randomized, Double-Blind, Delayed-Start Study of LY3314814 (AZD3293) in Early Alzheimer's Disease Dementia (Extension of Study AZES, The AMARANTH Study)                                                                                                                                                                                                 | Terminated (An independent assessment concluded the trial was not likely to meet the primary endpoint upon | Interventional, phase III, RCT                     | Puerto Rico, other countries in North America, Europe, Asia and Oceania                                                    | --                                                           |

|             |                                                                                                                                                                                                                          |                                                                                                                        |                                           |                                                                         |                                                                                                                                                                                                                                                                                                                                                                                                                                                                                                                                                                                                                                                                                                         |
|-------------|--------------------------------------------------------------------------------------------------------------------------------------------------------------------------------------------------------------------------|------------------------------------------------------------------------------------------------------------------------|-------------------------------------------|-------------------------------------------------------------------------|---------------------------------------------------------------------------------------------------------------------------------------------------------------------------------------------------------------------------------------------------------------------------------------------------------------------------------------------------------------------------------------------------------------------------------------------------------------------------------------------------------------------------------------------------------------------------------------------------------------------------------------------------------------------------------------------------------|
|             |                                                                                                                                                                                                                          | completion)                                                                                                            |                                           |                                                                         |                                                                                                                                                                                                                                                                                                                                                                                                                                                                                                                                                                                                                                                                                                         |
| NCT02245737 | A 24-month, Multicenter, Randomized, Double-blind, Placebo-controlled, Parallel-group, Efficacy, Safety, Tolerability, Biomarker, and Pharmacokinetic Study of AZD3293 in Early Alzheimer's Disease (The AMARANTH Study) | Terminated (An independent assessment concluded the trial was not likely to meet the primary endpoint upon completion) | Interventional, phase II/III, RCT         | Puerto Rico, other countries in North America, Europe, Asia and Oceania | Cebers G., et al. J Alzheimers Dis. 2017; 55(3):1039-1053.                                                                                                                                                                                                                                                                                                                                                                                                                                                                                                                                                                                                                                              |
| NCT02760602 | A 24-Month, Phase 3, Multicenter, Placebo-Controlled Study of Efficacy and Safety of Solanezumab Versus Placebo in Prodromal Alzheimer's Disease                                                                         | Terminated (Insufficient scientific evidence that solanezumab)                                                         | Interventional, phase III, RCT            | Puerto Rico, other countries in North America, Europe and Asia          | --                                                                                                                                                                                                                                                                                                                                                                                                                                                                                                                                                                                                                                                                                                      |
| NCT00838110 | A Phase 3, Multi-Center, Randomized, Double-Blind Placebo-Controlled Study To Evaluate The Safety And Tolerability Of Dimebon (PF-01913539) For Up To 26-Weeks In Patients With Mild To Moderate Alzheimer's Disease     | Finished                                                                                                               | Interventional, phase III, RCT            | Puerto Rico, other countries in North America                           | --                                                                                                                                                                                                                                                                                                                                                                                                                                                                                                                                                                                                                                                                                                      |
| NCT00939783 | An Open Label Extension To The B1451027 Protocol To Evaluate The Long Term Safety And Tolerability Of Dimebon (PF 01913539) In Patients With Alzheimer's Disease                                                         | Terminated (as part of modification of the dimebon development plan)                                                   | Interventional, phase III, non-randomized | Puerto Rico, other countries in North America                           | --                                                                                                                                                                                                                                                                                                                                                                                                                                                                                                                                                                                                                                                                                                      |
| NCT00040378 | Prevention of Alzheimer's Disease by Vitamin E and Selenium (PREADVISE)                                                                                                                                                  | Finished                                                                                                               | Observational, prospective                | Puerto Rico, Canada, United States                                      | 1- Lovell MA., et al. Neurology. 1995 Aug; 45(8):1594-601. 2- Sano M., et al. N Engl J Med. 1997 Apr 24; 336(17):1216-22. 3- Markesbery WR., et al. Brain Pathol. 1999 Jan 9(1):133-46 .4- Goodman PJ., et al. Trials. 2016 Aug 12; 17: 400. 5- Mathews M., et al. Curr Alzheimer Res. 2013 Sep; 10(7):776-83. 6- Kryscio RJ., et al. J Nutr Health Aging. 2013 Jan; 17(1):72-5. 7- Abner EL., et al. Trials. 2012 Nov 20; 13:217. 8- Caban-Holt A., et al. Clin Neuropsychol. 2012; 26(5):751-68. 10- Ding X., et al. J Am Geriatr Soc. 2016 Dec; 64(12):2472-2478. 11- Abner EL., et al. J Prev Alzheimers Dis. 2015 Mar; 2(1):11-16. 12- Kryscio RJ., et al. JAMA Neurol. 2017 May 1; 74(5):567-573. |

|             |                                                                                                                                                                                                |                        |                                                   |                                                                      |                                                                                                                                                                                                                                                                                                                                                                                                                                                                                                                 |
|-------------|------------------------------------------------------------------------------------------------------------------------------------------------------------------------------------------------|------------------------|---------------------------------------------------|----------------------------------------------------------------------|-----------------------------------------------------------------------------------------------------------------------------------------------------------------------------------------------------------------------------------------------------------------------------------------------------------------------------------------------------------------------------------------------------------------------------------------------------------------------------------------------------------------|
| NCT00235716 | A Randomized, Clinical Trial of Vitamin E and Memantine in Alzheimer's Disease (TEAM-AD)                                                                                                       | Finished               | Interventional, phase III, RCT                    | Puerto Rico, United States                                           | 1- Dysken MW., et al. Alzheimers Dement. 2014 Jan; 10(1):36-44. 2- Dysken MW., et al. JAMA. 2014 Jan 1; 311 (1):33-44.                                                                                                                                                                                                                                                                                                                                                                                          |
| NCT02187276 | The Predictive Factors of Good Clinical Response to Cholinesterase Inhibitors in Alzheimer Disease and Mixed Dementia                                                                          | Finished               | Observational, prospective                        | Brazil                                                               | Miranda LF., et al. J Alzheimers Dis. 2015; 45(2):609-20.                                                                                                                                                                                                                                                                                                                                                                                                                                                       |
| NCT03349320 | Response to Donepezil, Drug Plasma Concentration and the CYP2D6 and APOE Genetic Polymorphisms                                                                                                 | Finished               | Observational, prospective                        | Brazil                                                               | Miranda LF., et al. J Alzheimers Dis. 2017; 55(2):539-549.                                                                                                                                                                                                                                                                                                                                                                                                                                                      |
| NCT01994265 | Cognitive Impairment Related to Atrial Fibrillation Prevention Trial                                                                                                                           | Active, not recruiting | Interventional, phase IV, RCT                     | Brazil                                                               | Toledo ASF., et al. Int J Clin Trials. 2015; 2(4): 102-107                                                                                                                                                                                                                                                                                                                                                                                                                                                      |
| NCT03644290 | Cognitive Training in Stroke Patients                                                                                                                                                          | Active                 | Interventional, RCT, non-pharmacological          | Brazil, United Sates                                                 | 1- Miotto EC., et al. NeuroRehabilitation. 2012; 31(4):463-4. 2- Batista AX., et al., Cortex 2019, vol. 113, pp. 15–28. 3- Batista AX., et al. Neural Plasticity Research 2019; Article (16 pages), Article ID 4172569. 4- Campanholo KR., et al. Behav Neurol. 2015                                                                                                                                                                                                                                            |
| NCT03263247 | Cognitive Training in Patients With MCI Using fMRI                                                                                                                                             | Active                 | Interventional, RCT, non-pharmacological          | Brazil, United Sates                                                 | 1- Miotto EC., et al. Neural Plasticity 2018. Volume 2018, Article ID 7301530. 2- Balardin JB., et al. Front Aging Neurosci. 2015 Aug 4; 7:147. 3- Serrao VT., et al Dement Neuropsychol. 2015 Jul-Sep; 9(3):265-269. 4- Miotto EC., et al. Arq Neuropsiquiatr. 2014 Sep; 72(9):663-70. 5- Miotto EC., et al. Int Psychogeriatr. 2013 Jul; 25(7):1203-4. 6- Miotto EC., et al. Dement Neuropsychol. 2008 Apr-Jun; 2(2):139-145. 7- Fonseca LM., et al. Dement Geriatr Cogn Dis Extra. 2015 Sep 18; 5(3):330-40. |
| NCT00406588 | A Multicenter, Randomized, Double-blind, Placebo-controlled, Parallel Group Study of SLV308 as Adjunct Therapy to Levodopa in Patients With Parkinson's Disease Experiencing Motor Fluctuation | Completed              | Interventional, Phase III, RCT                    | Brazil, Colombia, Chile, other countries in North America and Europe | Rascol O.,et al. Parkinsonism Relat Disord. 2012 May; 18(4):370-6.                                                                                                                                                                                                                                                                                                                                                                                                                                              |
| NCT01978353 | Memory Strategy Training for Face Name Associations in the Amnesic Mild Cognitive Impairment: Cognitive and Magnetic Resonance Imaging Outcomes                                                | Finished               | Interventional, RCT, non-pharmacological          | Brazil, United Sates                                                 | 1- Simon SS., et al. Frontiers of Aging Neuroscience 2018. 2- Simon SS., et al. International Journal of Psychophysiology 2019.                                                                                                                                                                                                                                                                                                                                                                                 |
| NCT03911765 | Effect of Digital Cognitive Training on the Functionality of Older Adults With Mild Cognitive Impairment (MCI)                                                                                 | Recruiting             | Interventional, Phase I RCT, crossover assignment | Brazil                                                               | --                                                                                                                                                                                                                                                                                                                                                                                                                                                                                                              |
| NCT01286389 | Caloric Restriction in Obese Patients With Mild Cognitive Impairment: Effects on Adiposity, Comorbidity and Cognition                                                                          | Completed              | Interventional (Clinical Trial)                   | Brazil                                                               | --                                                                                                                                                                                                                                                                                                                                                                                                                                                                                                              |
| NCT02121457 | Brazil Nuts Effects on Selenium Status and Cognitive Performance                                                                                                                               | Completed              | Interventional                                    | Brazil                                                               | --                                                                                                                                                                                                                                                                                                                                                                                                                                                                                                              |
| NCT01142258 | Trazodone for Sleep Disorders in Alzheimer's Disease                                                                                                                                           | Completed              | Intervention, phase III                           | Brazil                                                               | --                                                                                                                                                                                                                                                                                                                                                                                                                                                                                                              |

|             |                                                                                                                      |            |                                          |        |                                                              |
|-------------|----------------------------------------------------------------------------------------------------------------------|------------|------------------------------------------|--------|--------------------------------------------------------------|
| NCT01481558 | Effects of Transcranial Direct Current Stimulation on the Apathy of Alzheimer's Disease                              | Completed  | Intervention, Parallel Assignment        | Brazil | Suemoto CK., et al. Brain Stimul. 2014 Mar-Apr; 7(2):308-13. |
| NCT03260608 | Effectiveness of a Psychoeducation and Support Protocol by Phone in the Aid of Caregivers of Patients With Dementia. | Recruiting | Interventional, RCT, non-pharmacological | Brazil | --                                                           |



### Annex 3: Local and regional research initiatives

| Countries involved                               | Source                                                                           | Title                                                                                                                                    | Study type                                                                                            | Number and type of participants                                            | Status      | Representative Publications                                                                                                  | Other information                            |
|--------------------------------------------------|----------------------------------------------------------------------------------|------------------------------------------------------------------------------------------------------------------------------------------|-------------------------------------------------------------------------------------------------------|----------------------------------------------------------------------------|-------------|------------------------------------------------------------------------------------------------------------------------------|----------------------------------------------|
| Argentina, Brazil, Puerto Rico                   | Alzheimer's Association                                                          | Alzheimer's Disease Neuroimaging Initiative                                                                                              | Cognition, imaging and genetics                                                                       | >1000, including AD, MCI and controls                                      | Ongoing     | Carrillo et al. Alzheimers Dement. 2012 Jul; 8(4):337-42.                                                                    | Ongoing plans to include Colombia and Mexico |
| Argentina, Brazil, Chile, Colombia, Mexico, Peru | Alzheimer's Association<br>Tau Consortium<br>GBHI<br>NIH NIA                     | Multi-partner consortium to expand dementia research in Latin America                                                                    | Comparison of genetics, imaging and cognition in US vs Latin American samples of AD, FTD and controls | 4200 participants (1050 AD, 1050 FTD, 2100 controls)                       | To initiate | --                                                                                                                           | --                                           |
| Argentina, Brazil, Colombia, Peru                | NIH R01 AG057234                                                                 | US-South American Initiative for Genetic-Neural-Behavioral Interactions in Human Neurodegenerative Research                              | Comparison of genetics, imaging and cognition in US vs South American samples of AD, FTD and controls | 3000 participants (750 AD, 750 FTD, 1500 controls)                         | To initiate | --                                                                                                                           | --                                           |
| Chile                                            | National Fund for Scientific and Technological Development (FONDECYT) # 11100457 | The needs of people with dementia and its relationship with personal, social and caregivers' factors.                                    | Cross-sectional survey to identify PWD's met and unmet needs                                          | 166 dyads of people with dementia and their informal caregivers            | Finished    | 1- Tapia Muñoz, T., et al. BMC Geriatrics 2019; 19, 106. 2- León-Campos, MO., et al. Ansiedad y Estrés 2018; 24(2-3), 73-80. | --                                           |
| Chile                                            | National Fund for Scientific and Technological Development (FONDECYT) # 1141279  | Implementation and effectiveness of an evidence-based psychoeducational program in a group of family caregivers of people with dementia. | RCT Psychosocial intervention for family caregivers of PWD                                            | 91 family caregivers of PWD                                                | Finished    | --                                                                                                                           | --                                           |
| Chile                                            | National Fund for Scientific and Technological Development (FONDECYT) # 1191726  | Trajectories and predictors of depression and anxiety symptoms in family caregivers of PWD: a longitudinal study                         | Cohort, observational                                                                                 | 250 dyads of people with dementia and their family caregivers              | To initiate | --                                                                                                                           | --                                           |
| Chile                                            | Research Fund, University of Valparaíso, N° 08/2009                              | "Adaptation, pilot and effectiveness of a Cognitive Stimulation Program in a group of older people with Alzheimer's Disease.             | Pilot RCT Cognitive Stimulation Therapy                                                               | 22 institutionalised persons with dementia                                 | Finished    | Miranda-Castillo, C. et al. Universitas Psychologica 2013. 12. 445-456.                                                      | --                                           |
| Argentina, Chile                                 | PICT Grant, FONCYT, Argentina                                                    | Neurocognitive and translational neuromarkers for neurodegenerative disorders: An ecological approach based on                           | Cognition, imaging                                                                                    | >100, including, AD, PD, FTD, stroke, ataxia, multiple sclerosis, controls | Ongoing     | Salamone, PC., et al. Human Brain Mapping 2018; Dec;39(12):4743-4754.                                                        | Ongoing plans to include Uruguay             |

|                                                        |                                                                                            |                                                                                                                                                                                        |                                    |                                            |         |                                                                                                                |                                                                                                                                                                                                                                                                                                                                                                                                                                                                                                                                                                                    |
|--------------------------------------------------------|--------------------------------------------------------------------------------------------|----------------------------------------------------------------------------------------------------------------------------------------------------------------------------------------|------------------------------------|--------------------------------------------|---------|----------------------------------------------------------------------------------------------------------------|------------------------------------------------------------------------------------------------------------------------------------------------------------------------------------------------------------------------------------------------------------------------------------------------------------------------------------------------------------------------------------------------------------------------------------------------------------------------------------------------------------------------------------------------------------------------------------|
|                                                        |                                                                                            | socio-emotional processing and language embodiment                                                                                                                                     |                                    |                                            |         |                                                                                                                |                                                                                                                                                                                                                                                                                                                                                                                                                                                                                                                                                                                    |
| Argentina, Chile                                       | PICT Grant, FONCYT, Argentina                                                              | The cognitive impact of non-invasive brain stimulation combined with behavioral training: memory and language in patients with mild cognitive impairment and early Parkinson's disease | --                                 | >100, including, AD, MCI, PD, and controls | Ongoing | --                                                                                                             | --                                                                                                                                                                                                                                                                                                                                                                                                                                                                                                                                                                                 |
| Argentina                                              | SGCTIP-FONARSEC (PBIT/09), Argentina                                                       | Translational Medicine Program for Innovations in Research, Diagnosis and Treatment of Alzheimer's Disease                                                                             | Cognition, biomarkers and genetics | >1000, including AD, MCI and controls      | Ongoing | Dalmaso et al. Translational Psychiatry 2019; 9:55.                                                            | --                                                                                                                                                                                                                                                                                                                                                                                                                                                                                                                                                                                 |
| Argentina                                              | FONCyT-PICT2015-0285, Argentina                                                            | Neo-angiogenesis and Bioenergetics: new paradigms for the search of biomarkers with prognostic value in Alzheimer's disease                                                            | Cognition, biomarkers and genetics | 25 cases and 25 controls                   | Ongoing | --                                                                                                             | --                                                                                                                                                                                                                                                                                                                                                                                                                                                                                                                                                                                 |
| Argentina                                              | FONCyT-PICT Start up (PICT-2016-4647), Argentina                                           | TARGET-AD: a clinical algorithm that considers the risk of Alzheimer's disease through the use of genetic variants and their interaction with environmental factors                    | --                                 | >1000, including AD, MCI and controls      | Ongoing | --                                                                                                             | Ongoing plans to include Uruguay                                                                                                                                                                                                                                                                                                                                                                                                                                                                                                                                                   |
| Argentina, Chile, Uruguay, Spain, Portugal and Germany | EU-LAC Health-Neurodegeneration JOINT CALL 2016-2017                                       | HIGH FAT DIET, MICROBIOTA AND NEUROINFLAMMATION IN THE PROGRESSION OF ALZHEIMER DISEASE                                                                                                | cognition, genetic, diet           | 25 cases and 25 controls                   | Ongoing | --                                                                                                             | --                                                                                                                                                                                                                                                                                                                                                                                                                                                                                                                                                                                 |
| Brazil                                                 | FAPESP - The State of São Paulo Research Foundation (grants #2015/10109-5 & #2015/18125-0) | Comparative analysis of cerebrospinal fluid and serum markers in dementia with Lewy Bodies and Alzheimer's Disease dementia                                                            | cross-sectional                    | 54 patients and 27 controls                | Ongoing | Representation in the Executive Committee of the ISTAART Biofluid Based Biomarkers Professional Interest Area. | Available at <a href="https://bv.fapesp.br/en/bolsas/161804/comparative-analysis-of-cerebrospinal-fluid-and-serum-markers-in-dementia-with-lewy-bodies-and-alzhe/">https://bv.fapesp.br/en/bolsas/161804/comparative-analysis-of-cerebrospinal-fluid-and-serum-markers-in-dementia-with-lewy-bodies-and-alzhe/</a> or at <a href="https://grants.ube.br/research.com/501100001807/15%252F18125-0/Comparative-analysis-of-cerebrospinal-fluid-and-serum-">https://grants.ube.br/research.com/501100001807/15%252F18125-0/Comparative-analysis-of-cerebrospinal-fluid-and-serum-</a> |

|        |                                                                                                                                                                                                                                                                                                                                                                               |                                                                                                                                                                                                                                   |                                                               |                                           |          |                |                                                                       |
|--------|-------------------------------------------------------------------------------------------------------------------------------------------------------------------------------------------------------------------------------------------------------------------------------------------------------------------------------------------------------------------------------|-----------------------------------------------------------------------------------------------------------------------------------------------------------------------------------------------------------------------------------|---------------------------------------------------------------|-------------------------------------------|----------|----------------|-----------------------------------------------------------------------|
|        |                                                                                                                                                                                                                                                                                                                                                                               |                                                                                                                                                                                                                                   |                                                               |                                           |          |                | markers-in-dementia-with-Lewy-Bodies-and-Alzheimers-Disease-dementia. |
| Brazil | FAPESP Grant 13/01758-4                                                                                                                                                                                                                                                                                                                                                       | Research of GRN and MAPT mutations and plasma progranulin dosage in Brazilian patients from patients with frontotemporal lobar degeneration                                                                                       | --                                                            | --                                        | --       | --             | --                                                                    |
| Peru   | National fund for scientific, technological and innovation development (FONDECYT) # 103-2018 FONDECYT                                                                                                                                                                                                                                                                         | Identification of altered brain connectivity patterns as a cognitive biomarker in pre-clinical phases of dementia using low density EEG                                                                                           | Cognition, EEG biomarkers                                     | >140, including SCD, MCI, AD and controls | Ongoing  | --             | --                                                                    |
| Peru   | Research Fund, Universidad Nacional de San Agustín, # IAI-007-2018-UNSA                                                                                                                                                                                                                                                                                                       | Effects of cognitive training on brain processing networks in older people with subjective cognitive decline                                                                                                                      | Non-pharmacological intervention, EEG functional connectivity | > 60, including SCD and controls          | Ongoing  | --             | --                                                                    |
| Chile  | Primer Concurso Idea en dos etapas temático en Adulto Mayor Fomento al Desarrollo Científico y Tecnológico-Fondef de Conicyt FONDEF # ID16AM0046 (2016-2018) Plataforma informática de análisis de variables médicas y psico-sociales para la caracterización, categorización y monitoreo de adultos mayores con enfermedades cerebrales : Una experiencia demostrativa en la | Plataforma informática de análisis de variables médicas y psico-sociales para la caracterización, categorización y monitoreo de adultos mayores con enfermedades cerebrales : Una experiencia demostrativa en la región de Aysén. | Cross-sectional survey                                        | 80 elderly living at the community        | Finished | In preparation | --                                                                    |

|            |                                                                                                |                                                                                                                     |                                                                                           |                                                                             |          |                                                                                                                                                                                                                                |    |
|------------|------------------------------------------------------------------------------------------------|---------------------------------------------------------------------------------------------------------------------|-------------------------------------------------------------------------------------------|-----------------------------------------------------------------------------|----------|--------------------------------------------------------------------------------------------------------------------------------------------------------------------------------------------------------------------------------|----|
|            | región de Aysén.                                                                               |                                                                                                                     |                                                                                           |                                                                             |          |                                                                                                                                                                                                                                |    |
| Chile      | Fondap N° 15150012 (2016-2020)                                                                 | Geroscience Center for brain Health and Metabolism.                                                                 | Longitudinal study                                                                        | 150 (expect inclusion: 300) with SCD and MCI. Ongoing.                      | Ongoing  | Thumala D., et al. Health Syst Reform 2017; 3(4):253-260.                                                                                                                                                                      | -- |
| Chile      | Fondecyt # 1160940 (2016- 2019)                                                                | Social cognition in the amyotrophic lateral sclerosis and frontotemporal dementia continuum.                        | Cross-sectional clinical study . Cognition and Neuroimaging                               | 15 FTD patients, 20 ALS and 20 controls                                     | Finished | Lillo P., et al. Revista Médica de Chile 2014; 142: 867-879                                                                                                                                                                    | -- |
| Chile      | Fondecyt # 1140423 (2014-2016)                                                                 | Physiopathology of Apathy in Alzheimer's Disease: A neuropsychological and neuroimaging study                       | Cross-sectional clinical study . Cognition and Neuroimaging                               | 40 patients with Alzheimer's disease dementia and 40 healthy brain controls | Finished | 1- Slachevsky A., et al. Journal of Neurology 2019; 1–13. 2- Delgado C., et al. J Alzheimers Dis. 2019; 67(1):381-392.                                                                                                         | -- |
| Chile      | Fondecyt # 1140114 (2014-2016)                                                                 | Fluid intelligence, social cognition and perspective change as predictors of psychosocial adaptability              | --                                                                                        | --                                                                          | --       | --                                                                                                                                                                                                                             | -- |
| Chile      | Fondecyt (2009-2012) 1100975                                                                   | Validation of Neuropsychological Tests and Biomarkers For The Diagnosis Of Mild Alzheimer Disease.                  | Cross-sectional clinical study. Cognition and Neuroimaging                                | 30 patients with Alzheimer's disease dementia and 30 healthy brain controls | Finished | 1- Slachevsky A., et al. J Alzheimers Dis. 2018; 62(4):1887-1900. 2- Slachevsky A., et al. Journal of Alzheimer's Disease 2017; 55(4):1595-1603. 3- Delgado C., et al. Archives of Clinical Neuropsychology 2016; 31(2):165-75 | -- |
| Chile      | Cuarto Concurso de Proyectos de Investigación 2009 - 2010 Servicio Salud Metropolitano Oriente | Burden of informal Caregivers of People with Alzheimer's Disease and other Dementias and study of cost of dementia  | Cross-sectional clinical study. Caregiver burden and its determinant and cost of dementia | --                                                                          | Finished | 1- Slachevsky A., et al. Journal of Alzheimer's Disease 2013; 35: 297–306. 2- Hojman DA., et al. Plos One 2017; 12(3): e0172204.                                                                                               | -- |
| Chile      | Proyecto Fonis SAO 412065 2004                                                                 | Red de demencias: capacitación a médicos de atención primaria e intervención psicoeducativa en cuidadores informale | Pilot study on capacitation and psychosocial intervention in dementia                     | 30 caregivers and 30 GP                                                     | Finished | Slachevsky A., et al. Guía para Familiares y cuidadores 2017; LOM (Book)                                                                                                                                                       | -- |
| Costa Rica | Award Number P01ES016731 from the National Institute of Environmental Health Sciences          | Parkinson's and Alzheimer's diseases in Costa Rica: a feasibility study toward a national screening program.        | Feasibility study                                                                         | 401elders                                                                   | Finished | Wesseling, C., et al. Global health action 2013, 6, 23061.                                                                                                                                                                     | -- |
| Costa Rica | Award no. P01ES016731 from the National Institute of                                           | Occupational pesticide exposure and screening tests for neurodegenerative disease                                   | Screening pilot study                                                                     | 400 elders                                                                  | Finished | Steenland K., et al. Environ Res. 2013 Jan; 120:96-101.                                                                                                                                                                        | -- |

|            |                                                                                                                  |                                                                                                                                                                         |                                 |                                                                                                             |          |                                                                                                                                                                                                                                                                                                                                                                                                                                                                                                                                                                                           |    |
|------------|------------------------------------------------------------------------------------------------------------------|-------------------------------------------------------------------------------------------------------------------------------------------------------------------------|---------------------------------|-------------------------------------------------------------------------------------------------------------|----------|-------------------------------------------------------------------------------------------------------------------------------------------------------------------------------------------------------------------------------------------------------------------------------------------------------------------------------------------------------------------------------------------------------------------------------------------------------------------------------------------------------------------------------------------------------------------------------------------|----|
|            | Environmental Health Sciences                                                                                    | among an elderly population in Costa Rica.                                                                                                                              |                                 |                                                                                                             |          |                                                                                                                                                                                                                                                                                                                                                                                                                                                                                                                                                                                           |    |
| Costa Rica | NIH Fogarty International Center & National Institute on Aging grant: R21TW009258                                | Association of apolipoprotein E-e4 and dementia declines with age.                                                                                                      | Association observational study | 210 elders                                                                                                  | Finished | Valerio, D., et al. Official journal of the American Association for Geriatric Psychiatry 2014; 22(10), 957–960.                                                                                                                                                                                                                                                                                                                                                                                                                                                                          | -- |
| Costa Rica | Memory Clinic of the National geriatrics and Gerontology Hospital, Dr Raul Blanco Cervantes, San Jose Costa Rica | Memory clinic experience under a social security health system in Costa Rica.                                                                                           | Observational study             | 3572 elders                                                                                                 | Finished | Miranda-Valverde, E., et al. Dementia & neuropsychologia 2014, 8(4), 371–375.                                                                                                                                                                                                                                                                                                                                                                                                                                                                                                             | -- |
| Chile      | Fondo de innovación para investigación en salud, Facultad de Medicina Universidad de Chile                       | Cultural adaptation of the Tailored Activity Program (TAP) for family caregivers of older adults with dementia in Chile                                                 | Implementacion Science Research | 10 family caregivers and 10 persons with dementia, 3 implementers (occupational therapists), 6 stakeholders | Ongoing  | Gajardo, J., et al. Innovation in Aging 2017, 1(S1), 1332.                                                                                                                                                                                                                                                                                                                                                                                                                                                                                                                                | -- |
| Brazil     | FAPESP - The State of São Paulo Research Foundation (grants #2006/55318-1 and #2009/09134-4)                     | Brain Bank of the Biobank for Aging Studies                                                                                                                             | Observational study             | 1200 brains                                                                                                 | Ongoing  | 1- Grinberg LT., et al. Cell Tissue Bank 2007; 8:151-62. 2- Ehrenberg AJ., et al. J Alzheimers Dis. 2018. 3- Farfel JM., et al. Neurology 2013; 81:650-7. 4- Madeira C., et al. Transl Psychiatry. 2015; 5:e561. 5- Nascimento C., et al. Brain Pathol. 2016; 26:177-85. 6- Schlesinger D., et al. Mol Psychiatry 2011. 7- Suemoto CK., et al. Stroke. 2011; 42:3614-5. 8- Suemoto CK., et al. PLoS Med. 2017; 14:e1002267. 9- Theofilas P., et al. Alzheimers Dement. 2017; 13:236-246. 10- Villela D., et al. Front Genet. 2016; 7:107. 11- Villela D., et al. J Genet. 2014; 93:535-7. | -- |
| Brazil     | São Paulo Research Foundation (FAPESP) 2018/15571-7                                                              | Mapping the progression of Subjective Cognitive Decline to Mild Cognitive Impairment and Alzheimer's disease dementia with multimodal biomarkers                        | Prospective study               | 100 SCD, 100 MCI, 50 AD                                                                                     | Ongoing  | --                                                                                                                                                                                                                                                                                                                                                                                                                                                                                                                                                                                        | -- |
| Brazil     | São Paulo Research Foundation (FAPESP) 2011/17092-0                                                              | Biomarkers in Alzheimer's disease and Mild Cognitive Impairment: evaluation of functional magnetic resonance imaging methods, plasmatic and cerebrospinal fluid markers | --                              | 50 AD, 100 MCI, 100 controls                                                                                | Finished | --                                                                                                                                                                                                                                                                                                                                                                                                                                                                                                                                                                                        | -- |

|        |                                                                                                                                                 |                                                                                         |                                  |                                                            |          |                                                                                                                                                                                                                                                                                                                                                                                                                                                                                                                                                                                                                                                                                                                                                                                                                                                                                                                                                                                                                                                                                                                                                                                                                                                             |    |
|--------|-------------------------------------------------------------------------------------------------------------------------------------------------|-----------------------------------------------------------------------------------------|----------------------------------|------------------------------------------------------------|----------|-------------------------------------------------------------------------------------------------------------------------------------------------------------------------------------------------------------------------------------------------------------------------------------------------------------------------------------------------------------------------------------------------------------------------------------------------------------------------------------------------------------------------------------------------------------------------------------------------------------------------------------------------------------------------------------------------------------------------------------------------------------------------------------------------------------------------------------------------------------------------------------------------------------------------------------------------------------------------------------------------------------------------------------------------------------------------------------------------------------------------------------------------------------------------------------------------------------------------------------------------------------|----|
| Chile  | Comisión Nacional de Investigación Científica y Tecnológica - CONICYT, PFCHA/DOCTORADO BECA NACIONAL/2012 – 21120639.                           | Self-stigma in older adults with dementia: Addressing the matter in the Chilean context | Qualitative study                | 11 older adults with the diagnosis of early-stage dementia | Finished | Gajardo, J. The Journal of the Alzheimer's Association 2018.                                                                                                                                                                                                                                                                                                                                                                                                                                                                                                                                                                                                                                                                                                                                                                                                                                                                                                                                                                                                                                                                                                                                                                                                | -- |
| Mexico | National Institutes of Health/National Institute on Aging (NIH R01AG051158)                                                                     | The Cognitive Aging Ancillary Study (Mex-Cog)                                           | Longitudinal Observational Study | 2700 older adults                                          | Ongoing  | Gajardo, J. The Journal of the Alzheimer's Association 2018.                                                                                                                                                                                                                                                                                                                                                                                                                                                                                                                                                                                                                                                                                                                                                                                                                                                                                                                                                                                                                                                                                                                                                                                                | -- |
| Mexico | National Institutes of Health/National Institute on Aging (grant number NIH R01AG018016) and the National Institute of Statistics and Geography | Mexican Health and Aging Study                                                          | Longitudinal Observational Study | 15988 older adults                                         | Ongoing  | 1- Aguilar-Navarro SG., et al. Salud Publica Mex. 2007; 49 Suppl 4:S467-74. 2- Al Hazzouri Adina Z., et al. Journal of Aging and Health 2011; 23(7):1027-1049. 3- Mejia-Arango S., et al. J Aging Health. 2011; 23(7):1050-74. 4- Mejía-Arango S. et al. Salud Publica Mex. 2007; 49 Suppl 4:S475-81. 5- Mejía S., et al. J Aging Health. 2006. 6- Melano-Carranza E., et al. Rev Panam Salud Publica. 2008; 23(5):295-302. 7- Montes de Oca VM., et al. Rev Kairos. 2008; 11(1):143-166. 8- Skirbekk V., et al. Proc Natl Acad Sci USA. 2012; 109(3):770-4. 9- Mejía-Arango S., et al. Rev Neurol. 2011; 53(7):397-405. 10- Mejía-Arango S., et al. Salud Publica Mex. 2015; 57 Suppl 1:S90-6. 11- Downer B., et al. Am J Alzheimers Dis Other Demen. 2016 Nov; 31(7):564-569. 12- Downer B., et al. J Alzheimers Dis. 2016 Mar 8; 52(1):191-203. 13- Veeranki SP., et al. J Aging Health. 2017 Apr; 29(3):454-473. 14- Downer B., et al. Ethn Health. 2018 Jan; 23(1):57-71. 15- Saenz J., et al. J Aging Health. 2017 Apr 1:898264317703560. 16- Saenz JL., et al. J Epidemiol Community Health. 2018 Jan; 72(1):21-26. 17- Díaz-Venegas C., et al. Aging & Mental Health 2012. 18- Saenz JL., et al. Aging Ment Health. 2018; Dec 27:1-10. 19- Aguilar- | -- |

|                                                                                                    |                                                                                                                                                           |                                                                                                                      |                                          |                                                                       |         |                                                                                                                                                                                                                                                                                                                |    |
|----------------------------------------------------------------------------------------------------|-----------------------------------------------------------------------------------------------------------------------------------------------------------|----------------------------------------------------------------------------------------------------------------------|------------------------------------------|-----------------------------------------------------------------------|---------|----------------------------------------------------------------------------------------------------------------------------------------------------------------------------------------------------------------------------------------------------------------------------------------------------------------|----|
|                                                                                                    |                                                                                                                                                           |                                                                                                                      |                                          |                                                                       |         | Navarro SG., et al. J Nutr Health Aging 2019; 23(3):227-231.                                                                                                                                                                                                                                                   |    |
| Brazil                                                                                             | CNPq (National Research Council, Brazil - Grants 300424/2010-8 and 474712/2013-3 ) and FAPEMIG (Minas Gerais Research Foundation, Brazil - BPD-00082-12). | Investigation of diagnostic biomarkers in patients with mild cognitive impairment and Alzheimer disease.             | Prospective study                        | 300 individuals (MCI, AD, non-AD dementias, controls)                 | Ongoing | 1- Corrêa JD., et al. Arq Neuropsiquiatr. 2011; 69: 455-9. 2- Magalhães CA., et al. Arq Neuropsiquiatr 2017; 75: 649-656. 3- Rocha NP., et al. J Alzheimers Dis 2018; 64: 1085-1090. 4- Magalhães CA., et al. J Clin Neurosci 2018; 56: 150-155. 5- Magalhães CA., et al. Clin Chem Lab Med 2019; 57: e77-e80. | -- |
| Chile                                                                                              | Anillo Project ACP1403                                                                                                                                    | From presbycusis to dementia: a basic and clinical approach                                                          | Cross-sectional                          | 125 subjects. Control, MCI and AD; with or without hearing impairment | Ongoing | Belkhiria C., et al. Front. Aging Neurosci. 2019; 11:97.                                                                                                                                                                                                                                                       | -- |
| Chile                                                                                              | INNOVA-CORFO Project                                                                                                                                      | Advanced clinical trials and molecular composition of the internationally-positioned formula BrainUp-10              | double blind randomized controlled trial | 74 AD subjects                                                        | Ongoing | --                                                                                                                                                                                                                                                                                                             | -- |
| Uruguay, Chile, Spain, USA, Thailand, Bulgaria, Estonia, Slovenia, Bangladesh, South Africa, India | International Atomic Energy Agency                                                                                                                        | Enhancing Capacity of Neuroimaging and Biomarkers: Application in Early-stage Alzheimer's Disease with Comorbidities | Prospective study                        | 300 individuals (MCI, AD)                                             | Ongoing | --                                                                                                                                                                                                                                                                                                             | -- |
| Australia                                                                                          | NHMRC National Institute for Dementia Research                                                                                                            | Non Alzheimer's disease degenerative dementias                                                                       | Prospective study                        | 300 individuals from dementia families (DLB, FTD, MND)                | Ongoing | --                                                                                                                                                                                                                                                                                                             | -- |
| Australia                                                                                          | National Health and Medical Research Council of Australia                                                                                                 | Frontotemporal dementia and motor neurodegenerative syndromes                                                        | Prospective study                        | > 600 individuals (FTD, MND)                                          | Ongoing | 1- Ahmed RM., et al. Nat Rev Neurol 2018; 14 (5):259-271. 2- Chen Y., et al. Ann Neurol 2018; 84(1):98-109.                                                                                                                                                                                                    | -- |
| Australia                                                                                          | National Health and Medical Research Council of Australia                                                                                                 | Our MOB (Mind Our Brain): Dementia prevention across the life course with Aboriginal                                 | Prospective study                        | ~300 older adults                                                     | Ongoing | --                                                                                                                                                                                                                                                                                                             | -- |

|                          |                                                                                                                              | Australians                                                                                                                                                   |                                                                                        |                                             |          |                |    |
|--------------------------|------------------------------------------------------------------------------------------------------------------------------|---------------------------------------------------------------------------------------------------------------------------------------------------------------|----------------------------------------------------------------------------------------|---------------------------------------------|----------|----------------|----|
| Uruguay, Argentina       | Agencia Nariional de Investigación e Innovación (ANII), Consejo Nacional de Investigaciones Científicas y Técnicas (CONICET) | Evaluación del Flujo Sanguíneo Cerebral, el Depósito de Amiloide y el Metabolismo Cerebral en pacientes con Afasia Primaria Progresiva                        | Pilot study                                                                            | 30 PPA patients                             | Finished | --             | -- |
| Colombia                 | Colciencias (111565741185)                                                                                                   | Marcadores preclínicos para el diagnóstico diferencial de las demencias de inicio temprano                                                                    | Prospective study                                                                      | Older adults                                | Finished | --             | -- |
| Colombia                 | Colciencias (111565740786)                                                                                                   | Estudio de iPCSs como modelo de la Enfermedad de Alzheimer familiar: Implicaciones terapéuticas                                                               | Trasversal study                                                                       | Older adults                                | Finished | --             | -- |
| Colombia                 | Colciencias (111565741597)                                                                                                   | Aspectos Clínicos y Genéticos en personas con quejas de memoria y deterioro cognitivo leve                                                                    | Trasversal study                                                                       | Older adults                                | Finished | --             | -- |
| Colombia                 | Colciencias (110171149904)                                                                                                   | Caracterización Clínica y genética con grupos familiares con enfermedad de Alzheimer y trastornos de movimiento con patrones de herencia mendelianos          | Prospective study                                                                      | Older adults                                | Finished | --             | -- |
| Colombia                 | Colciencias(371-2011)                                                                                                        | Los lóbulos frontales: estudio clínico y genético de la Demencia Frontotemporal.                                                                              | Trasversal study                                                                       | Older adults                                | Finished | --             | -- |
| Colombia-USA             | NIH 1R21AG046499-01                                                                                                          | YOUNG-ONSET DEMENTIA IN COLOMBIA                                                                                                                              | Prospective study                                                                      | Older adults                                | Ongoing  | --             | -- |
| Colombia-USA             | GBHI ALZ UK-19-592004                                                                                                        | Relationship between quantity, frequency and severity of alcohol, tobacco and drug consumption with the age of onset of EOAD in PSN1 E280A mutation carriers. | Prospective study                                                                      | People with Early Onset Alzheimer's Disease | Ongoing  | In preparation | -- |
| Uruguay, Germany, Italy  | EU-LAC HEALTH Joint Call for Proposal 2016/2017                                                                              | Assessing mechanisms of Neurodegeneration and Neuroprotection by multimodal Neuroimaging: from healthy Aging to Alzheimer's Disease                           | Prospective study                                                                      | 240 individuals                             | Ongoing  | --             | -- |
| Argentina (Buenos Aires) | Memory Laboratory of Zubizarreta Hospital career of clinical researcher, government of Buenos Aires, Argentina               | Mild cognitive impairment: risk of dementia according to subtypes                                                                                             | Longitudinal Follow-up, cohort study of 127 patients diagnosed with MCI (Buenos Aires) | 127> 60                                     | --       | --             | -- |
| Argentina (Buenos        | Memory Laboratory of Zubizarreta Hospital,                                                                                   | Efficacy of a cognitive intervention program in patients                                                                                                      | Follow-up Study of cognitive                                                           | Forty-six MCI participants                  | Finished | --             | -- |



|                          |                                                                      |                                                                                                                                                                                          |                                      |                                                                                                                                           |          |                                                                        |    |
|--------------------------|----------------------------------------------------------------------|------------------------------------------------------------------------------------------------------------------------------------------------------------------------------------------|--------------------------------------|-------------------------------------------------------------------------------------------------------------------------------------------|----------|------------------------------------------------------------------------|----|
| Aires)                   | Buenos Aires, Argentina                                              | with mild cognitive impairment.                                                                                                                                                          | intervention program in MCI (1 year) |                                                                                                                                           |          |                                                                        |    |
| Argentina (Buenos Aires) | career of clinical researcher, government of Buenos Aires, Argentina | Clinical and economic characteristics associated with direct costs of Alzheimer's, frontotemporal and vascular dementia in Argentina.                                                    | Cross-sectional study                | 104 patients with dementia (DAT = 44, FTD = 34, VaD = 26) were screened and matched by age and educational level with 29 healthy subjects | Finished | --                                                                     | -- |
| Argentina (Buenos Aires) | Memory Laboratory of Zubizarreta Hospital, Buenos Aires, Argentina   | Cognitive, functional and behavioral factors associated with the burden of caring for geriatric patients with cognitive impairment or depression: evidence from a South American sample. | Cross-sectional study                | 258 caregiver-patient pairs                                                                                                               | Finished | --                                                                     | -- |
| Argentina (Buenos Aires) | FLENI, Buenos Aires, Argentina                                       | A biological classification for Alzheimer's disease - Amyloid, Tau and Neurodegeneration (A/T/N): results from the Argentine-Alzheimer's Disease Neuroimaging Initiative.                | Cross-sectional study                | --                                                                                                                                        | Finished | Allegri RF., et al. Int Psychogeriatr. 2019 Mar 12:1-2.                | -- |
| Argentina (Buenos Aires) | arg.ADNI Buenos Aires, Argentina                                     | Argentina-Alzheimer's disease neuroimaging initiative (Arg-ADNI): neuropsychological evolution profile after one-year follow up.                                                         | follow up study                      | 51 participants                                                                                                                           | Finished | Méndez PC., et al. Arq Neuropsiquiatr. 2018 Apr; 76(4):231-240.        | -- |
| Argentina (Buenos Aires) | FLENI, Buenos Aires, Argentina                                       | Biomarkers of Alzheimer's disease in mild cognitive impairment: Experience in a memory clinic from Latin America                                                                         | Cross-sectional study                | 150 participants                                                                                                                          | Finished | Allegri RF., et al. Neurologia 2018; Apr 7.                            | -- |
| Argentina (Buenos Aires) | CEMIC Memory Clinic, Buenos Aires, Argentina                         | Risk of Conversion to Dementia in a Mild Behavioral Impairment Group Compared to a Psychiatric Group and to a Mild Cognitive Impairment Group                                            | Follow up study                      | 677 participants                                                                                                                          | Finished | Taragano FE., et al. J Alzheimers Dis. 2018; 62(1):227-238.            | -- |
| Argentina (Buenos Aires) | Arg. ADNI Buenos Aires, Argentina                                    | Utility of the Spanish version of the Everyday Cognition scale in the diagnosis of mild cognitive impairment and mild dementia in an older cohort from the Argentina-ADNI.               | Cross-sectional study                | 56 participants                                                                                                                           | Finished | Russo MJ., et al. Aging Clin Exp Res. 2018 Oct; 30(10):1167-1176.      | -- |
| Argentina (Buenos Aires) | arg.ADNI Buenos Aires, Argentina                                     | Predicting episodic memory performance using different biomarkers: results from Argentina-Alzheimer's Disease                                                                            | Cross-sectional study                | 56 participants                                                                                                                           | Finished | Russo MJ., et al. Neuropsychiatr Dis Treat. 2016 Sep 13; 12:2199-2206. | -- |

|                          |                                                                    | Neuroimaging Initiative.                                                                                                                                                                        |                       |                                                                       |          |                                                                            |    |
|--------------------------|--------------------------------------------------------------------|-------------------------------------------------------------------------------------------------------------------------------------------------------------------------------------------------|-----------------------|-----------------------------------------------------------------------|----------|----------------------------------------------------------------------------|----|
| argentina (Buenos Aires) | Memory Laboratory of Zubizarreta Hospital, Buenos Aires, Argentina | Validation of the Argentine version of the Memory Binding Test (MBT) for Early Detection of Mild Cognitive Impairment.                                                                          | Cross-sectional study | 88 subjects                                                           | Finished | Roman F. et al. Dement Neuropsychol. 2016 Jul-Sep; 10(3):217-226.          | -- |
| Argentina (Buenos Aires) | arg.ADNI Buenos Aires, Argentina                                   | Cognitive reserve and Aβ1-42 in mild cognitive impairment (Argentina-Alzheimer's Disease Neuroimaging Initiative).                                                                              | Cross-sectional study | 33 participants                                                       | Finished | Harris P., et al. Neuropsychiatr Dis Treat. 2015 Oct 7; 11:2599-604.       | -- |
| Argentina (Buenos Aires) |                                                                    | Cognitive impairment and risk factor prevalence in a population over 60 in Argentina.                                                                                                           | Cross-sectional study | 1453 individuals aged 60                                              | Finished | Arizaga RL., et al. Dement Neuropsychol. 2014 Oct-Dec; 8(4):364-370.       | -- |
| Argentina (Buenos Aires) | FLENI, Buenos Aires, Argentina                                     | Utility of the Spanish version of the FTLD-modified CDR in the diagnosis and staging in frontotemporal lobar degeneration.                                                                      | Cross-sectional study | 131 participants                                                      | Finished | Russo G., et al. J Neurol Sci. 2014; Sep 15; 344(1-2):63-8.                | -- |
| Argentina (Buenos Aires) | cemic Memory Clinic, Buenos Aires, Argentina                       | Insurance status and demographic and clinical factors associated with pharmacologic treatment of depression: associations in a cohort in Buenos Aires.                                          | Cross-sectional study | 100 patients                                                          | Finished | Machnicki G., et al. Value Health 2011; Jul-Aug; 14(5 Suppl 1):S13-5..     | -- |
| Argentina (Buenos Aires) | 10/66 Dementia Group                                               | A brief dementia screener suitable for use by non-specialists in resource poor settings--the cross-cultural derivation and validation of the brief Community Screening Instrument for Dementia. | Cross-sectional study | 5 022 participants                                                    | Finished | Prince M., et al. Int J Geriatr Psychiatry 2011 Sep; 26(9):899-907.        | -- |
| Argentina (Buenos Aires) | CEMIC Memory Clinic, Buenos Aires, Argentina                       | Clinical manifestations of geriatric depression in a memory clinic: toward a proposed subtyping of geriatric depression.                                                                        | Cross-sectional study | 139 participants                                                      | Finished | Dillon C., et al. J Affect Disord. 2011 Nov; 134(1-3):177-87.              | -- |
| Argentina (Buenos Aires) | 10/66 Dementia Group                                               | Subjective memory deficits in people with and without dementia: findings from the 10/66 dementia research group pilot studies in low- and middle-income countries.                              | Cross-sectional study | Two thousand six hundred ninety-two community-dwelling people aged 60 | Finished | 10/66 Dementia Research Group. J Am Geriatr Soc. 2009 Nov; 57(11):2118-24. | -- |
| Argentina (Buenos Aires) | CEMIC Memory Clinic, Buenos Aires, Argentina                       | Role of cognitive reserve in progression from mild cognitive impairment to dementia.                                                                                                            | Follow-up Study       | 239 subjects                                                          | Finished | Allegri RF., et al. Dement Neuropsychol. 2010 Jan-Mar; 4(1):28-34.         | -- |
| Argentina (Buenos Aires) | Memory Laboratory of Zubizarreta Hospital, Buenos Aires, Argentina | Validity and reliability of the SF-36 administered to caregivers of patients with alzheimer's disease: evidence from a south american sample.                                                   | Cross-sectional study | Forty-eight caregivers of Alzheimer's disease patients                | Finished | Machnicki G., et al. Dement Geriatr Cogn Disord. 2009; 28(3):206-12.       | -- |

|                          |                                                                                                                                       |                                                                                                                                                                                                                       |                               |                                |          |                                                                                                                                                                                                                                                |    |
|--------------------------|---------------------------------------------------------------------------------------------------------------------------------------|-----------------------------------------------------------------------------------------------------------------------------------------------------------------------------------------------------------------------|-------------------------------|--------------------------------|----------|------------------------------------------------------------------------------------------------------------------------------------------------------------------------------------------------------------------------------------------------|----|
| Argentina (Buenos Aires) | CEMIC Memory Clinic, Buenos Aires, Argentina                                                                                          | Neuropsychiatric symptoms in mild cognitive impairment                                                                                                                                                                | Cross-sectional study         | 86 subjects                    | Finished | Demey I., et al. Vertex 2007; Jul-Aug; 18(74):252-7.                                                                                                                                                                                           | -- |
| Argentina (Buenos Aires) | CEMIC Memory Clinic, Buenos Aires, Argentina                                                                                          | Neuropsychiatric symptoms as a predictor of caregiver burden in Alzheimer's disease.                                                                                                                                  | Cross-sectional study         | 82 patients                    | Finished | Allegri RF., et al. Neuropsychiatr Dis Treat. 2006 Mar; 2(1):105-10.                                                                                                                                                                           | -- |
| Argentina (Buenos Aires) | CEMIC Memory Clinic, Buenos Aires, Argentina                                                                                          | A shortened form of the Spanish Boston naming test: a useful tool for the diagnosis of Alzheimer's disease]                                                                                                           | Cross-sectional study         | One hundred and three patients | Finished | Serrano C. et al. Rev Neurol. 2001 Oct 1-15; 33(7):624-7.                                                                                                                                                                                      | -- |
| Argentina (Buenos Aires) | Memory Laboratory of Zubizarreta Hospital, Buenos Aires, Argentina                                                                    | Butman J1, Allegri RF, Harris P, Drake M                                                                                                                                                                              | Cross-sectional study         | 266                            | Finished | Butman J., et al. Medicina (B Aires). 2000; 60(5 Pt 1):561-4.                                                                                                                                                                                  | -- |
| Argentina (Buenos Aires) | Memory Clinic, Milstein Hospital, Buenos Aires, Argentina                                                                             | Argentine Validation of the Spanish Version of the Montreal Cognitive Assessment Test (MoCA-S) and its usefulness in Mild Cognitive Impairment and Dementia in adults over 60 years of age.                           | Cross-sectional study         | 399 subjects >60 years         | Finished | Serrano CM., et al. 2019 (in preparation)                                                                                                                                                                                                      | -- |
| Argentina (Buenos Aires) | Memory Clinic, Milstein Hospital, Buenos Aires, Argentina                                                                             | Epidemiological study on aging, depression and dementia in a center of C.A.B.A                                                                                                                                        | Cross-sectional study         | 1877 subjets                   | Finished | Serrano CM., et al. 2019 (in preparation)                                                                                                                                                                                                      | -- |
| Argentina (Buenos Aires) | Memory Clinic, Italiano Hospital, Buenos Aires, Argentina                                                                             | ALBA Screening Instrument (ASI): A brief screening tool for Lewy Body Dementia.                                                                                                                                       | Cross-sectional study         | 427 subjects                   | Finished | Garcia Basalo MM., et al. Arch Gerontol Geriatr. 2017 May - Jun; 70:67-75.                                                                                                                                                                     | -- |
| Brazil (Minas Gerais)    | CNPq (National Research Council, Brazil - Grant 436735/2018-0                                                                         | Profile of biomarkers in cerebrospinal fluid and no peripheral blood of patients with Alzheimer's disease and mild cognitive impairment: recognition of mechanisms of Alzheimer's disease in the Brazilian population | Cross-sectional study         | 100 subjects                   | Ongoing  | --                                                                                                                                                                                                                                             | -- |
| Brazil (Minas Gerais)    | CNPq (National Research Council, Brazil - Grant 474208/2013-3; FAPEMIG (Minas Gerais Research Foundation, Brazil-grants APQ-02662-14) | Cohort of patients with Mild Cognitive Impairment - determination of risk factors for conversion to Alzheimer dementia                                                                                                | Cross-sectional study         | 350 subjects                   | Ongoing  | 1- Cintra, MTG et al. Journal of Geriatric Psychiatry 2018; v.33, p.e221 - e227. 2- De Paula JJ., et al. Frontiers in Psychology 2016; v.6, p.2061. 3-Vieira et al. International Journal of Geriatric Psychiatry 2016. , v.31, p.1337 - 1344. | -- |
| Argentina (Buenos Aires) | Neurogenetics Unit. Hospital JM Ramos Mejia. (Grant PICT 2014-1999; Grants from Ministry of Health of Buenos Aires)                   | Research of the genetic basis of neurogenetic disorders in a tertiary hospital from Buenos Aires, Argentina                                                                                                           | Observational study, genetics | ~ 1000 subjects                | Ongoing  | 1- Rodríguez-Quiroga SA., et al. Genet Res 2015; 97:e10. 2- Córdoba M., et al. PLoS One 2018; 13(2):e0191228.                                                                                                                                  | -- |

|        |                                                                                                                            |                                                                                                                                                                                                                                  |                                                                                                                   |                                                                                           |          |                                                                                                                                                                                                                                                                                                                                                                                          |    |
|--------|----------------------------------------------------------------------------------------------------------------------------|----------------------------------------------------------------------------------------------------------------------------------------------------------------------------------------------------------------------------------|-------------------------------------------------------------------------------------------------------------------|-------------------------------------------------------------------------------------------|----------|------------------------------------------------------------------------------------------------------------------------------------------------------------------------------------------------------------------------------------------------------------------------------------------------------------------------------------------------------------------------------------------|----|
| Brazil | CNPq (National Research Council, Brazil - Grant No. 429079/2018-4)                                                         | Aging and AD biomarkers in middle-age and older adults with Down syndrome                                                                                                                                                        | Cross-sectional + longitudinal study                                                                              | 100 subjects (AD, DS and age-matched controls)                                            | Ongoing  | Bram JMF., et al. Current Psychiatry Reviews 2019; 15, 000-000 (in press)                                                                                                                                                                                                                                                                                                                | -- |
| Brazil | INCT (CNPq Grant No. 465412/2014-9; FAPESP Grant No.14/50873-3)                                                            | InBion: National Institute for Biomarkers in Neuropsychiatry.                                                                                                                                                                    | Cross-sectional + longitudinal study                                                                              | 350 subjects (AD, MCI, MDD, BD, Schizophrenia and controls)                               | Ongoing  | --                                                                                                                                                                                                                                                                                                                                                                                       | -- |
| Brazil | FAPESP (Grant No. 2013/23135-9)                                                                                            | Early detection of cognitive impairments predictive of Alzheimer's disease using the eye movement analysis.                                                                                                                      | Cross-sectional                                                                                                   | 150 subjects (AD, MCI and controls)                                                       | Ongoing  | Pereira ML., et al. Neuropsychiatr Dis Treat. 2014 9; 10:1273-85                                                                                                                                                                                                                                                                                                                         | -- |
| Brazil | CNPq (Grant No. 466625/2014-6)                                                                                             | Expression and activity of amyloid precursor protein (APP)-secretases and glycogen synthase kinase-3 $\beta$ (GSK-3 $\beta$ ) activity in human platelets and neuronal cultures: effects of treatment with lithium and donepezil | --                                                                                                                | Translational + clinical-laboratorial study (peripheral biomarkers)                       | Finished | Bram JMF., et al. J Alzheimers Dis. 2017; 55(4):1445-1451.                                                                                                                                                                                                                                                                                                                               | -- |
| Brazil | Laboratory of Neuroscience (LIM-27), Institute of Psychiatry, University of Sao Paulo                                      | Randomised controlled clinical trial to evaluate a Brazilian Outpatient version of the TAP method (Tailored Activity Program) in reducing neuropsychiatric symptoms between individuals with dementia                            | RCT (Non-pharmacological intervention); Registered in: Brazilian Clinical Trials Registry (ReBec), No. RBR-66DH44 | 34 participants (subjects with mild and moderate dementia with neuropsychiatric symptoms) | Finished | de Oliveira AM., et al. Int J Geriatr Psychiatry 2018.                                                                                                                                                                                                                                                                                                                                   | -- |
| Brazil | CNPq (National Research Council, Brazil - Grant No 557887/2009-7                                                           | Envelhecer mantendo funções: idosos do ano 2020.                                                                                                                                                                                 | Cross-sectional, observational                                                                                    | 209 subjects                                                                              | Finished | 1- Murphy CFB., et al. J Am Acad Audiol. 2018 Jan; 29(1):5-14. 2- Silagi ML., et al. Cotas 2017; Nov 13; 29(6):e20160224. 3- Murphy CF., et al. Front Neurosci. 2016 Mar 10; 10:97. 4- Silagi ML., et al. Biomed Res Int. 2015; 2015:640657. 5- Silagi ML., et al. Dement Neuropsychol. 2013 Oct-Dec; 7(4):380-386. 6- Silagi ML., et al. Submitted to Journal of Neurological Sciences. | -- |
| Brazil | CAPES (Coordination Center for Graduate School Enhancement - Coordenação de Aperfeiçoamento de Pessoal de Ensino Superior) | Analysis of macrolinguistic aspects of narratives from individuals with Alzheimer's disease, mild cognitive impairment, and no cognitive impairment.                                                                             |                                                                                                                   | 60 subjects                                                                               | Finished | Toledo CM., et al. Alzheimers Dement (Amst) 2017; Sep 19;10:31-40.                                                                                                                                                                                                                                                                                                                       | -- |
| Brazil | FAPESP - The State of São Paulo Research Foundation                                                                        | Amyloid- $\beta$ depositionand neuropsychological profilein elderly with subjective cognitive                                                                                                                                    | Cross-sectional + longitudinal study                                                                              | 77 subjects                                                                               | Ongoing  | --                                                                                                                                                                                                                                                                                                                                                                                       | -- |

|        |                                             |                                                                             |    |    |    |    |    |
|--------|---------------------------------------------|-----------------------------------------------------------------------------|----|----|----|----|----|
|        | (2016/25000-1)                              | decline and SuperAgers                                                      |    |    |    |    |    |
| Brazil | Alzheimer's Association<br>(AARF-18-566005) | Characterization of tau<br>astrogliopathy on aging and<br>neurodegeneration | -- | -- | -- | -- | -- |

#### Annex 4: Initiatives for public policies and awareness

| Countries                 | Source                                                        | Title                                                                                   | Initiative type                                                                                         | Status   | Publications                                                                                                                                                                                                              | Others                                                                                                                                                                                                                                        |
|---------------------------|---------------------------------------------------------------|-----------------------------------------------------------------------------------------|---------------------------------------------------------------------------------------------------------|----------|---------------------------------------------------------------------------------------------------------------------------------------------------------------------------------------------------------------------------|-----------------------------------------------------------------------------------------------------------------------------------------------------------------------------------------------------------------------------------------------|
| Americas                  | PAHO (Pan American Health Organization)                       | Strategy and Plan of action on Dementias in Older Persons                               | Regional initiative (2015)                                                                              | Ongoing  | <a href="https://www.alz.co.uk/sites/default/files/plans/PAHO-plan-of-action-on-dementias-in-older-persons.pdf">https://www.alz.co.uk/sites/default/files/plans/PAHO-plan-of-action-on-dementias-in-older-persons.pdf</a> | --                                                                                                                                                                                                                                            |
| Argentina                 | Ministry of Health                                            | Plan Nacional de Demencia de Argentina                                                  | Public Policy                                                                                           | Ongoing  | --                                                                                                                                                                                                                        | --                                                                                                                                                                                                                                            |
| Argentina, Chile, Uruguay | Inter-American Development Bank (IDB)                         | Behavioral insight group for social protection and health policies: A lifespan approach | Clinical-public policy: Manual and software platform for registry of dementia and regional data sharing | Ongoing  | --                                                                                                                                                                                                                        | Potential extension to Brazil, Peru, Colombia                                                                                                                                                                                                 |
| Brazil                    | Ministry of health. Decree No 2528/GM, dated October 19, 2006 | National Policy on the Health of the Elderly (PNSPI)                                    | National policy                                                                                         | Ongoing  | Brasil. Ministério da Saúde (MS). Envelhecimento e saúde da pessoa idosa. Brasília: MS; 2006.                                                                                                                             | --                                                                                                                                                                                                                                            |
| Chile                     | Ministry of Health - Government of Chile                      | Plan Nacional de Demencia de Chile (2017-2025)                                          | Government dementia plan - National Policy                                                              | Ongoing  | Report <a href="https://www.minsa.cl/wp-content/uploads/2017/11/PLAN-DE-DEMENCIA.pdf">https://www.minsa.cl/wp-content/uploads/2017/11/PLAN-DE-DEMENCIA.pdf</a>                                                            | 1- Slachevsky A; Gajardo J (2019) Chile public health in Dementia Care: International Perspectives Editors Burns A, Robert Ph. Oxford University Press, Oxford. pp. 329-336. 2- Custodio N., et al. Front Aging Neurosci. 2017 Jul 13; 9:221. |
| Chile                     | Ministry of Health - Government of Chile                      | Línea Formativa Abordaje Integral de las Demencias.                                     | Program of courses for training in dementia professional and non-professional health-care workers       | Finished | --                                                                                                                                                                                                                        | --                                                                                                                                                                                                                                            |

|          |                                                                            |                                                                                                                    |                                                                                                                                                    |          |                                                                                                                                                                                        |                                                                                                                                                                               |
|----------|----------------------------------------------------------------------------|--------------------------------------------------------------------------------------------------------------------|----------------------------------------------------------------------------------------------------------------------------------------------------|----------|----------------------------------------------------------------------------------------------------------------------------------------------------------------------------------------|-------------------------------------------------------------------------------------------------------------------------------------------------------------------------------|
| Chile    | Ministry of Health - Government of Chile                                   | Guidelines for the Diagnosis of Dementia for Primary Care Physician                                                | Ministry of Health initiative to harmonize dementia diagnosis by GP                                                                                | Finished | --                                                                                                                                                                                     | Clínica Trastornos Cognitivos y Demencia en el Adulto Mayor, de los Drs. Patricio Fuentes, Archibaldo Donoso, Andrea Slachevsky, Alicia Villalobos, Luis Flores. MINSAL Chile |
| Chile    | National Service for Older Adults (SENAMA), Ministry of Social Development | Design, implementation, and evaluation of an adult day care center for persons with dementia and family caregivers | Academic-governmental cooperation                                                                                                                  | Finished | Gajardo J., et al. Dementia 2017.                                                                                                                                                      | --                                                                                                                                                                            |
| Chile    | University of Chile                                                        | Dementia Policy Paper                                                                                              | Academic initiative to raise awareness on dementia plan and promote evidence-based public policy                                                   | Ongoing  | Policy Paper. Prevención y abordaje integral de las demencias- Avances y desafíos para la política pública en materia de trastornos neurocognitivos                                    | Release 20/06                                                                                                                                                                 |
| Chile    | Coprad (Corporation Professional de Alzheimer y otras demencias)           | Propuesta de un Plan Nacional de Alzheimer y otras Demencias                                                       | Nonprofit civil association (Coprad) and profesional society (SONEPSYN) initiative to raise awareness on dementia and the needs of a dementia plan | Release  | Report <a href="http://www.coprad.cl/wp-content/uploads/2018/01/pasos_coprad_alzheimer_chile.pdf">http://www.coprad.cl/wp-content/uploads/2018/01/pasos_coprad_alzheimer_chile.pdf</a> | Thumala D., et al. Health Syst Reform. 2017; Oct 2; 3(4):253-260                                                                                                              |
| Chile    | Chilean Society of Neurology, Psychiatry and Neurosurgery (Sonepsyn)       | Guidelines for the diagnosis of dementia to specialist                                                             | Initiative for harmonize dementia practice at the specialist level                                                                                 | Finished | Guías clínicas de diagnóstico y tratamiento de las demencias. 2nd Edición Serie Azul. Santiago, Ediciones Sociedad de Neurología, Neurocirugía y Psiquiatría. Editor Behrens M         | --                                                                                                                                                                            |
| Colombia | Ministry of Health                                                         | Boletín de salud mental. Demencia                                                                                  | Government of Colombia                                                                                                                             | Ongoing  | <a href="https://www.minsalud.gov.co/sites/rid/Lists/BibliotecaDigital/">https://www.minsalud.gov.co/sites/rid/Lists/BibliotecaDigital/</a>                                            | --                                                                                                                                                                            |

|                                                                                                                              |                                                                                   |                                                                                                                |                                                                                                                                                                              |                |                                                                                                                                                                                                                     |    |
|------------------------------------------------------------------------------------------------------------------------------|-----------------------------------------------------------------------------------|----------------------------------------------------------------------------------------------------------------|------------------------------------------------------------------------------------------------------------------------------------------------------------------------------|----------------|---------------------------------------------------------------------------------------------------------------------------------------------------------------------------------------------------------------------|----|
|                                                                                                                              |                                                                                   |                                                                                                                |                                                                                                                                                                              |                | RIDE/ VS/ PP/ ENT/ Boletin-demencia -salud-mental.pdf                                                                                                                                                               |    |
| Colombia                                                                                                                     | Ministry of Health                                                                | Guía de práctica clínica para el diagnóstico y el tratamiento del trastorno neurocognoscitivo mayor (Demencia) | Government of Colombia                                                                                                                                                       | Ongoing        | <a href="http://gpc.minsalud.gov.co/gpc_sites/Repositorio/Otros_conv/GPC_Demencia/GPC_Demencia_Completa.pdf">http://gpc.minsalud.gov.co/gpc_sites/Repositorio/Otros_conv/GPC_Demencia/GPC_Demencia_Completa.pdf</a> | -- |
| Costa Rica                                                                                                                   | CONAPAM (Consejo Nacional de la Persona Adulta Mayor) Presidencia de la república | Plan Nacional para la Enfermedad de Alzheimer y Demencias relacionadas esfuerzos compartidos (2014-2024)       | Government dementia plan                                                                                                                                                     | Ongoing        | <a href="http://www.conapam.go.cr/mantenimiento/Plan%20Nacional%20Alzheimer.pdf">http://www.conapam.go.cr/mantenimiento/Plan%20Nacional%20Alzheimer.pdf</a>                                                         | -- |
| Cuba                                                                                                                         | International Journal of Cuban Health & Medicine 18 (4) Oct-Dec 2016              | Cuba's Strategy for Alzheimer Disease and Dementia Syndromes                                                   | Dementia national health program (2016)                                                                                                                                      | Ongoing        | <a href="https://www.ncbi.nlm.nih.gov/pubmed/27829648">https://www.ncbi.nlm.nih.gov/pubmed/27829648</a>                                                                                                             | -- |
| Global                                                                                                                       | ADI (Alzheimer disease association)                                               | World Alzheimer Report 2018. The state of the art of dementia research: New frontiers                          | Global report about all areas of dementia research world wide.                                                                                                               | Published 2018 | World Alzheimer Report 2018. Alzheimer's Disease International (ADI), London. September 2018 Copyright © Alzheimer's Disease International                                                                          | -- |
| Global                                                                                                                       | WHO (World health organization)                                                   | Global action plan on the public health response to dementia 2017 - 2025                                       | A global plan including people with dementia and their families, to improve the health and wellbeing of those affected by dementia, both for present and future generations. | Published 2017 | Global action plan on the public health response to dementia 2017 - 2025. World health organization 2017                                                                                                            | -- |
| Global, including Argentina, Brazil, Chile, Colombia, Costa Rica, El Salvador, Replublica Dominica, Mexico, Puerto Rico, and | Alzheimer's Association                                                           | International Society to Advance Alzheimer's Research and Treatment (ISTAART)                                  | International professional society dedicated to dementia scientist, clinician and professionals. Provides opportunities to virtually link experts from around the world.     | Ongoing        | <a href="https://action.alz.org/personifyebusiness/default.aspx?tabid=1516">https://action.alz.org/personifyebusiness/default.aspx?tabid=1516</a>                                                                   | -- |



|                                                                                                                                                 |                                                                                                                                                                                                                                                                                 |                                                                             |                                                                                                                                                                                                                                                |                  |                                                                                                                                                                               |    |
|-------------------------------------------------------------------------------------------------------------------------------------------------|---------------------------------------------------------------------------------------------------------------------------------------------------------------------------------------------------------------------------------------------------------------------------------|-----------------------------------------------------------------------------|------------------------------------------------------------------------------------------------------------------------------------------------------------------------------------------------------------------------------------------------|------------------|-------------------------------------------------------------------------------------------------------------------------------------------------------------------------------|----|
| Trinidad and Tobago                                                                                                                             |                                                                                                                                                                                                                                                                                 |                                                                             |                                                                                                                                                                                                                                                |                  |                                                                                                                                                                               |    |
| Global, including Argentina, Brazil, Chile, Colombia, Costa Rica, El Salvador, Republica Dominica, Mexico, Puerto Rico, and Trinidad and Tobago | Alzheimer's Association                                                                                                                                                                                                                                                         | Worldwide Alzheimer's Disease Neuroimaging Initiatives (WW-ADNI)            | Internatinational cosortium to bring together neuroimaging studies and other biomarkers from around the world with the objective to better understand and define the rate of progression of mild cognitive impairment and Alzheimer's disease. | Ongoing          | <a href="https://www.alz.org/research/for_researchers/partnerships/wwadni/argentina_adni">https://www.alz.org/research/for_researchers/partnerships/wwadni/argentina_adni</a> | -- |
| Global, including Argentina and Mexico                                                                                                          | Alzheimer's Association                                                                                                                                                                                                                                                         | World Wide FINGERS                                                          | Worldwide consortium aimed at evaluating multimodal lifestyle interventions to prevent cognitive decline, building on the findings from the FINGERS study (Multicenter randomized controlled trial)                                            | To be lauch soon | <a href="https://www.alz.org/wwfingers/overview.asp#projects">https://www.alz.org/wwfingers/overview.asp#projects</a>                                                         | -- |
| Latinos in the U.S.                                                                                                                             | Massachusetts General Hospital (MGH).                                                                                                                                                                                                                                           | Multicultural Alzheimer Prevention Program (MAPP).                          | Observational study.                                                                                                                                                                                                                           | Ongoing          | <a href="https://mapp.mgh.harvard.edu/active-recruitment-l-habs/">https://mapp.mgh.harvard.edu/active-recruitment-l-habs/</a>                                                 | -- |
| Mexico                                                                                                                                          | BPO (Biblioteca de publicaciones oficiales del gobierno de Mexico)                                                                                                                                                                                                              | Plan de acción Alzheimer y otras demencias, México 2014                     | Academic iniative aligned with the Mexican National Development Plan and Sectoral Health Program (2014)                                                                                                                                        | Finished         | <a href="https://bpo.sep.gob.mx/#/recurso/3456">https://bpo.sep.gob.mx/#/recurso/3456</a>                                                                                     | -- |
| Mexico                                                                                                                                          | Mexican academy of neurology                                                                                                                                                                                                                                                    | Guías prácticas del manejo de las demencias                                 | Practical guide                                                                                                                                                                                                                                | Finished         | Guías prácticas del manejo de las demencias. Rev Mex Neuroci. 2015; 16 (suplmento 1): S1-S129                                                                                 | -- |
| Mexico and Brazil                                                                                                                               | Universities of Sussex and Cape Town, Alzheimer's Disease International and Dementia. Alliance International. The Federation of Brazilian Alzheimer's Associations (Febraz). The Federal University of São Paulo (UNIFESP). Instituto Nacional de Geriateía (INGER, Mexico).The | STRIDE(Strengthening responses to dementia in developing countries) project | A project that aims to build research capacity and provide much-needed evidence on dementia care in developing countries                                                                                                                       | Project          | <a href="https://www.stride-dementia.org/project-partners">https://www.stride-dementia.org/project-partners</a>                                                               | -- |

|                                                           |                                                      |                                                                            |                                                                                                                             |         |                                                                                                                                                                                                                                                                                   |    |
|-----------------------------------------------------------|------------------------------------------------------|----------------------------------------------------------------------------|-----------------------------------------------------------------------------------------------------------------------------|---------|-----------------------------------------------------------------------------------------------------------------------------------------------------------------------------------------------------------------------------------------------------------------------------------|----|
|                                                           | Mexican Federation of Alzheimer's (FEDMA)            |                                                                            |                                                                                                                             |         |                                                                                                                                                                                                                                                                                   |    |
| Mexico city (2015), Buenos Aires (2018), Sao Paulo (2019) | Alzheimer's Association                              | Alzheimer's Association International Conference (AAIC) Satellite Symposia | Latin american forums that provide an opportunity for researchers to identify common ground and seed/expand collaborations. | Ongoing | --                                                                                                                                                                                                                                                                                | -- |
| Peru                                                      | Ministry of Health (Law N° 30795)                    | Ley para la prevención y el tratamiento de Alzheimer y otras demencias     | Government national action                                                                                                  | Ongoing | <a href="https://busquedas.elperuano.pe/normaslegales/ley-para-la-prevencion-y-tratamiento-de-la-enfermedad-del-al-ley-n-30795-1660608-13/">https://busquedas.elperuano.pe/normaslegales/ley-para-la-prevencion-y-tratamiento-de-la-enfermedad-del-al-ley-n-30795-1660608-13/</a> | -- |
| Uruguay                                                   | AUDAS (Asociación Uruguaya de Alzheimer y Similares) | Plan Nacional de Demencias para la República Oriental del Uruguay          | Nonprofit civil association (AUDAS)                                                                                         | Ongoing | <a href="https://www.audas.org.uy/06_Informacion/AUDAS_Plan_Nacional_Demencias-Presentacion_Publica.pdf">https://www.audas.org.uy/06_Informacion/AUDAS_Plan_Nacional_Demencias-Presentacion_Publica.pdf</a>                                                                       | -- |
| Uruguay                                                   | Legislatura                                          | Programa Nacional de Lucha Contra la Enfermedad de Alzheimer               | Government Bill                                                                                                             | 2016    | <a href="https://legislativo.parlamento.gub.uy/temporales/D2016090537-008527261.pdf">https://legislativo.parlamento.gub.uy/temporales/D2016090537-008527261.pdf</a>                                                                                                               | -- |
| Venezuela                                                 | Fundación Alzheimer Venezuela- Avaaz Venezuela       | Alzheimer. Plan de acción nacional en políticas públicas.                  | Petition for a national dementia plan                                                                                       | Ongoing | <a href="https://www.alzheimervenezuela.org/article/firma-ahora-manana-podrias-ser-tu-unidos-por-el-al/">https://www.alzheimervenezuela.org/article/firma-ahora-manana-podrias-ser-tu-unidos-por-el-al/</a>                                                                       | -- |
